# Supplementary material
Source: publisher figshare collection journal article supplement (https://acs.figshare.com/ndownloader/files/25559790)
Supplement: Supplementary file 1 [file 25559790]

## Supporting information

### New Visible-Light-Driven H<sub>2</sub>- and O<sub>2</sub>-Evolving Photocatalysts Developed by Ag(I) and Cu(I) Ion Exchange of Various Layered and Tunneling Metal Oxides Using Molten Salts Treatments

Kenta Watanabe<sup>1</sup>, Katsuya Iwashina<sup>1</sup>, Akihide Iwase<sup>1,2</sup>, Shunsuke Nozawa<sup>3</sup>, Shin-ichi Adachi<sup>3</sup>, and Akihiko Kudo<sup>\*1,2</sup>

<sup>1</sup>Department of Applied Chemistry, Faculty of Science, Tokyo University of Science, 1-3 Kagurazaka, Shinjuku-ku, Tokyo 162-8601, Japan

<sup>2</sup>Photocatalysis International Research Center, Research Institute for Science and Technology, Tokyo University of Science, 2641 Yamazaki Noda-shi, Chiba-ken 278-8510, Japan

<sup>3</sup>Institute of Materials Structure Science, High Energy Accelerator Research Organization, 1-1 Oho, Tsukuba, Ibaraki 305-0801, Japan

#### Contents

|                                                                                                                                                                                                                       |    |
|-----------------------------------------------------------------------------------------------------------------------------------------------------------------------------------------------------------------------|----|
| <b>Figure S1-S6.</b> XRD patterns of the obtained layered materials.                                                                                                                                                  | 2  |
| <b>Figure S7-S12.</b> SEM images of some obtained layered materials.                                                                                                                                                  | 8  |
| <b>Figure S13.</b> XRD patterns of the obtained tunneling materials                                                                                                                                                   | 10 |
| <b>Figure S14-S16.</b> SEM images of some obtained tunneling materials                                                                                                                                                | 11 |
| <b>Figure S17.</b> Crystal structure of Li <sub>2</sub> Ti <sub>6</sub> O <sub>13</sub> .                                                                                                                             | 12 |
| <b>Figure S18-S43.</b> Diffuse reflectance spectra of obtained materials.                                                                                                                                             | 13 |
| <b>Figure S44.</b> Photocatalytic O <sub>2</sub> evolution over Ag(I)-K <sub>2</sub> SrTa <sub>2</sub> O <sub>7</sub> under visible light irradiation.                                                                | 26 |
| <b>Figure S45.</b> XRD patterns of Ag(I)-K <sub>2</sub> SrTa <sub>2</sub> O <sub>7</sub> before and after sacrificial O <sub>2</sub> evolution.                                                                       | 26 |
| <b>Figure S46.</b> Photocatalytic H <sub>2</sub> evolution over Cu(I)-Li <sub>2</sub> SrTi <sub>6</sub> O <sub>14</sub> under visible light irradiation.                                                              | 27 |
| <b>Figure S47.</b> Wavelength dependence of H <sub>2</sub> evolution over Cu(I)-Li <sub>2</sub> SrTi <sub>6</sub> O <sub>14</sub> .                                                                                   | 27 |
| <b>Figure S48.</b> Crystal structure of K <sub>2</sub> La <sub>2</sub> Ti <sub>3</sub> O <sub>10</sub> and K <sub>2</sub> SrTa <sub>2</sub> O <sub>7</sub> .                                                          | 28 |
| <b>Figure S49.</b> XRD patterns of Cu(I)-K <sub>2</sub> La <sub>2</sub> Ti <sub>3</sub> O <sub>10</sub> and Cu(I)-Na <sub>2</sub> La <sub>2</sub> Ti <sub>3</sub> O <sub>10</sub> .                                   | 28 |
| <b>Figure S50.</b> XRD patterns of Cu(I)-K <sub>2</sub> SrTa <sub>2</sub> O <sub>7</sub> before and after sacrificial H <sub>2</sub> evolution.                                                                       | 29 |
| <b>Figure S51.</b> Sr3d and Ta4f XPS spectra of K <sub>2</sub> SrTa <sub>2</sub> O <sub>7</sub> , Ag(I)-K <sub>2</sub> SrTa <sub>2</sub> O <sub>7</sub> , and Cu(I)-K <sub>2</sub> SrTa <sub>2</sub> O <sub>7</sub> . | 29 |
| <b>Figure S52.</b> Cu K-edge XANES spectrum of Cu(I)-KLaTa <sub>2</sub> O <sub>7</sub> .                                                                                                                              | 30 |
| <b>Figure S53.</b> XRD patterns of CuTa <sub>2</sub> O <sub>6</sub> .                                                                                                                                                 | 30 |

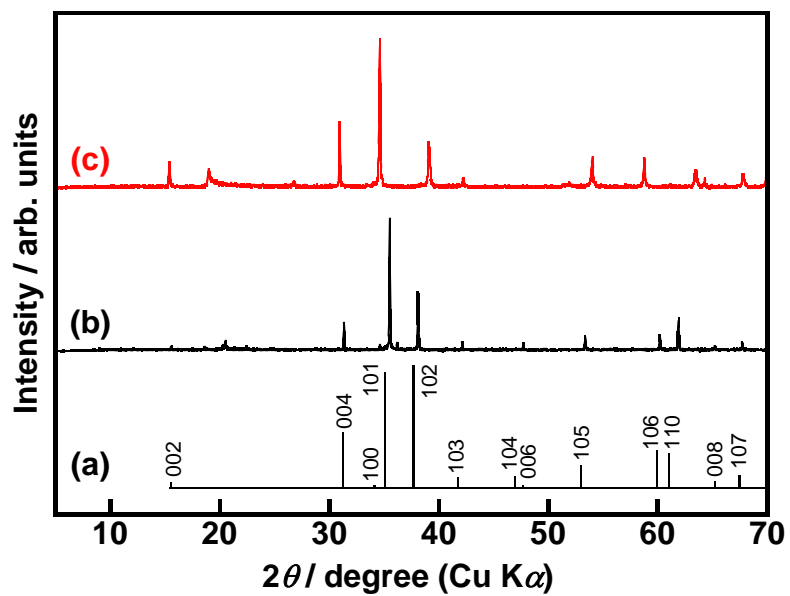

**Figure S1.** XRD patterns of (a) CuFeO<sub>2</sub> (Hexagonal, PDF 1-79-1546), (b) CuLi<sub>1/3</sub>Ti<sub>2/3</sub>O<sub>2</sub> (Hexagonal), and (c) Cu(I)-Li<sub>2</sub>SnO<sub>3</sub>. CuCl was used as a flux for the synthesis of CuLi<sub>1/3</sub>Ti<sub>2/3</sub>O<sub>2</sub> and Cu(I)-Li<sub>2</sub>SnO<sub>3</sub>.

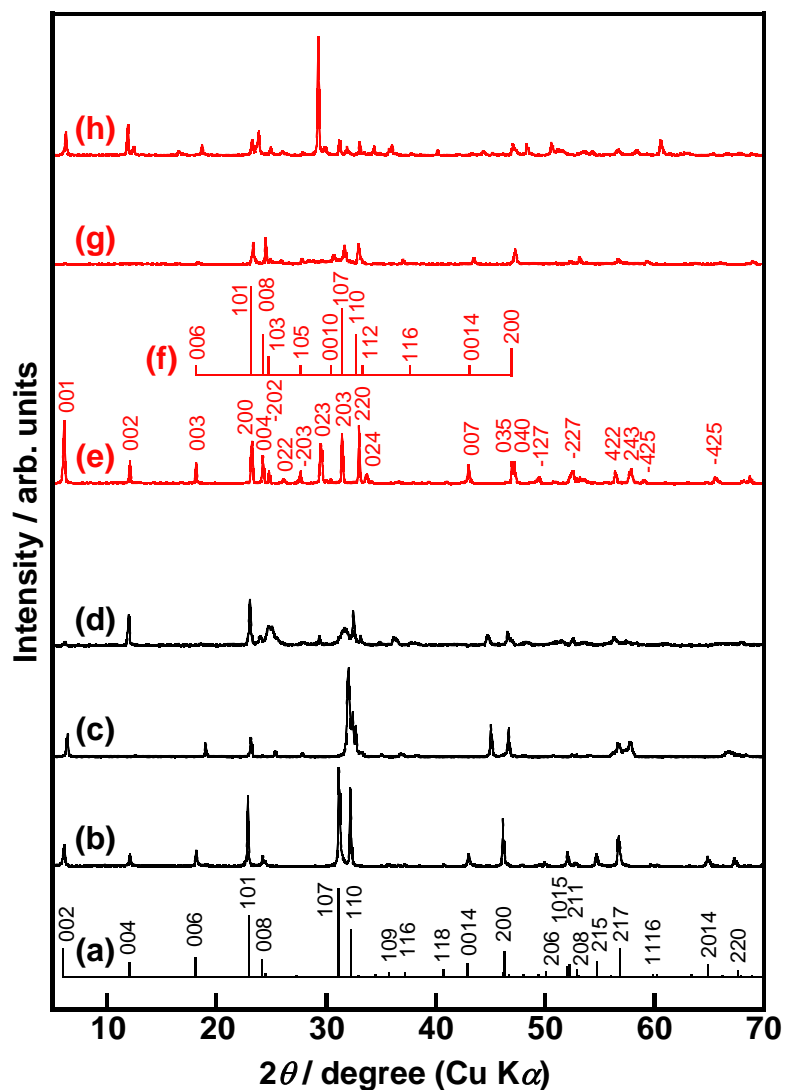

**Figure S2.** XRD patterns of (a)  $\text{K}_2\text{CaNaTa}_3\text{O}_{10}$  (PDF 1-70-6006), (b)  $\text{K}_2\text{CaNaNb}_3\text{O}_{10}$ , (c)  $\text{Ag(I)-K}_2\text{CaNaNb}_3\text{O}_{10}$ , (d)  $\text{Cu(I)-K}_2\text{CaNaNb}_3\text{O}_{10}$ , (e)  $\text{KCa}_2\text{Nb}_3\text{O}_{10}$ , (f)  $\text{AgCa}_2\text{Ta}_3\text{O}_{10}$  (PDF 52-1081), (g)  $\text{Ag(I)-KCa}_2\text{Nb}_3\text{O}_{10}$ , and (h)  $\text{Cu(I)-KCa}_2\text{Nb}_3\text{O}_{10}$ .  $\text{CuCl}$  was used as a flux for the synthesis of all  $\text{Cu(I)}$ -substituted materials. A plane index for  $\text{KCa}_2\text{Nb}_3\text{O}_{10}$  was referred to PDF 1-75-9853.

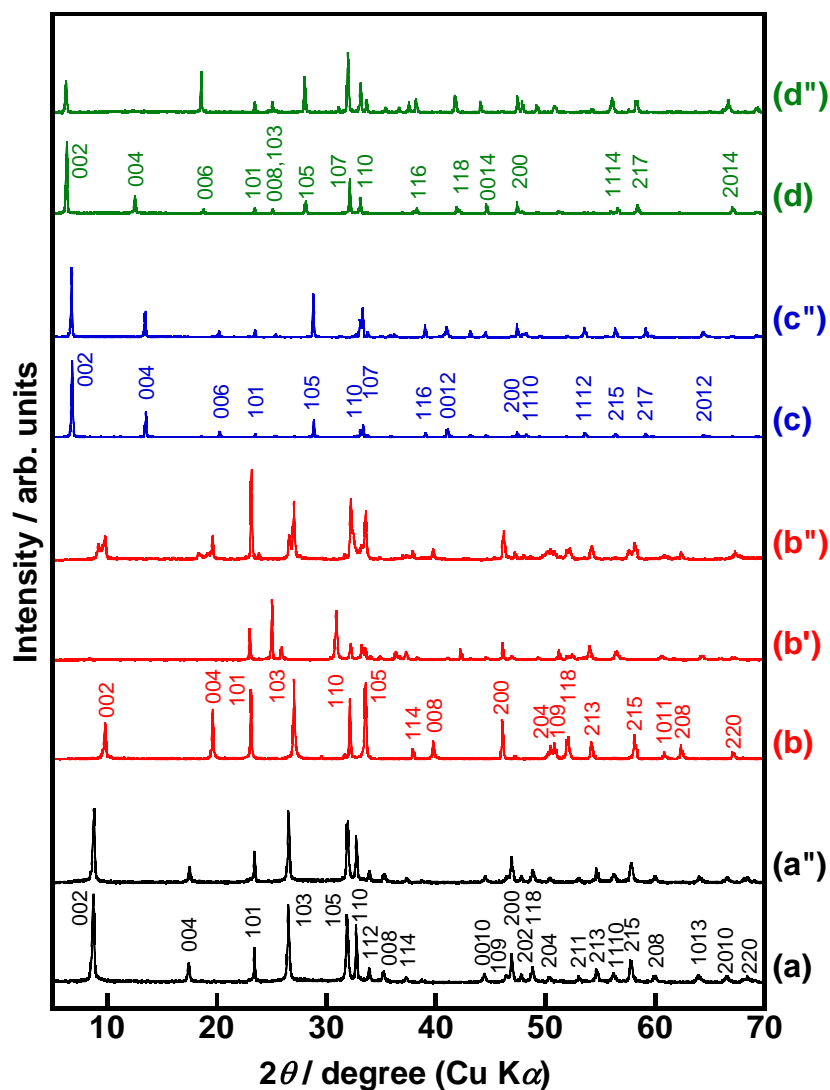

**Figure S3.** XRD patterns of layered metal oxides with and without molten salt treatments. Host materials, and their Ag(I)- and Cu(I)-ion-exchanged materials were labeled as (x), (x'), and (x''), respectively. (a) LiLaTa<sub>2</sub>O<sub>7</sub>, (b) Li<sub>2</sub>SrTa<sub>2</sub>O<sub>7</sub>, (c) Li<sub>2</sub>La<sub>2</sub>Ti<sub>3</sub>O<sub>10</sub>, and (d) Na<sub>2</sub>La<sub>2</sub>Ti<sub>3</sub>O<sub>10</sub>. CuCl was used as a flux for the synthesis of all Cu(I)-substituted materials. Plane indices for LiLaTa<sub>2</sub>O<sub>7</sub>, Li<sub>2</sub>SrTa<sub>2</sub>O<sub>7</sub>, Li<sub>2</sub>La<sub>2</sub>Ti<sub>3</sub>O<sub>10</sub>, and Na<sub>2</sub>La<sub>2</sub>Ti<sub>3</sub>O<sub>10</sub> were referred to PDFs 1-82-8704, 1-89-8144, 1-87-1169, and 1-86-1369, respectively.

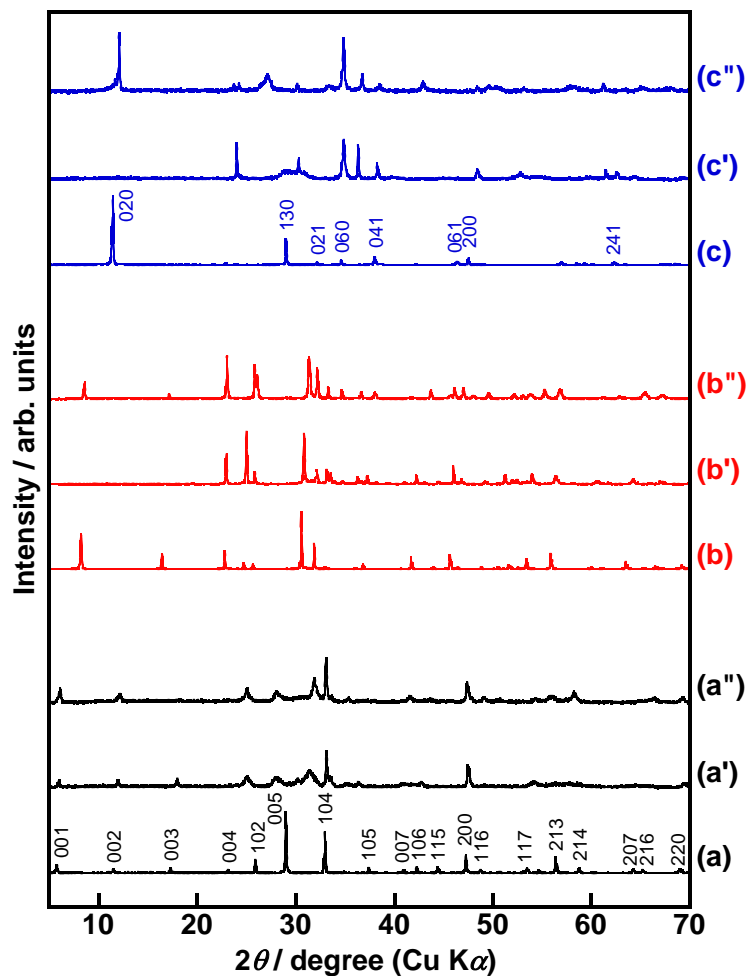

**Figure S4.** XRD patterns of layered metal oxides with and without molten salt treatments. Host materials, and their Ag(I)- and Cu(I)-ion-exchanged materials were labeled as (x), (x'), and (x''), respectively. (a)  $\text{CsLa}_2\text{Ti}_2\text{TaO}_{10}$ , (b)  $\text{K}_2\text{SrNb}_{0.2}\text{Ta}_{1.8}\text{O}_7$ , and (c)  $\text{K}_{0.8}\text{Mg}_{0.4}\text{Ti}_{1.6}\text{O}_4$ . CuCl was used as a flux for the synthesis of Cu(I)- $\text{CsLa}_2\text{Ti}_2\text{TaO}_{10}$  and Cu(I)- $\text{K}_2\text{SrNb}_{0.2}\text{Ta}_{1.8}\text{O}_7$ . CuCl-CuI mixture was used as a flux for the synthesis of Cu(I)- $\text{K}_{0.8}\text{Mg}_{0.4}\text{Ti}_{1.6}\text{O}_4$ . Plane indices for  $\text{CsLa}_2\text{Ti}_2\text{TaO}_{10}$  and  $\text{K}_{0.8}\text{Mg}_{0.4}\text{Ti}_{1.6}\text{O}_4$  were referred to PDFs 1-70-7828 and 1-73-671, respectively.

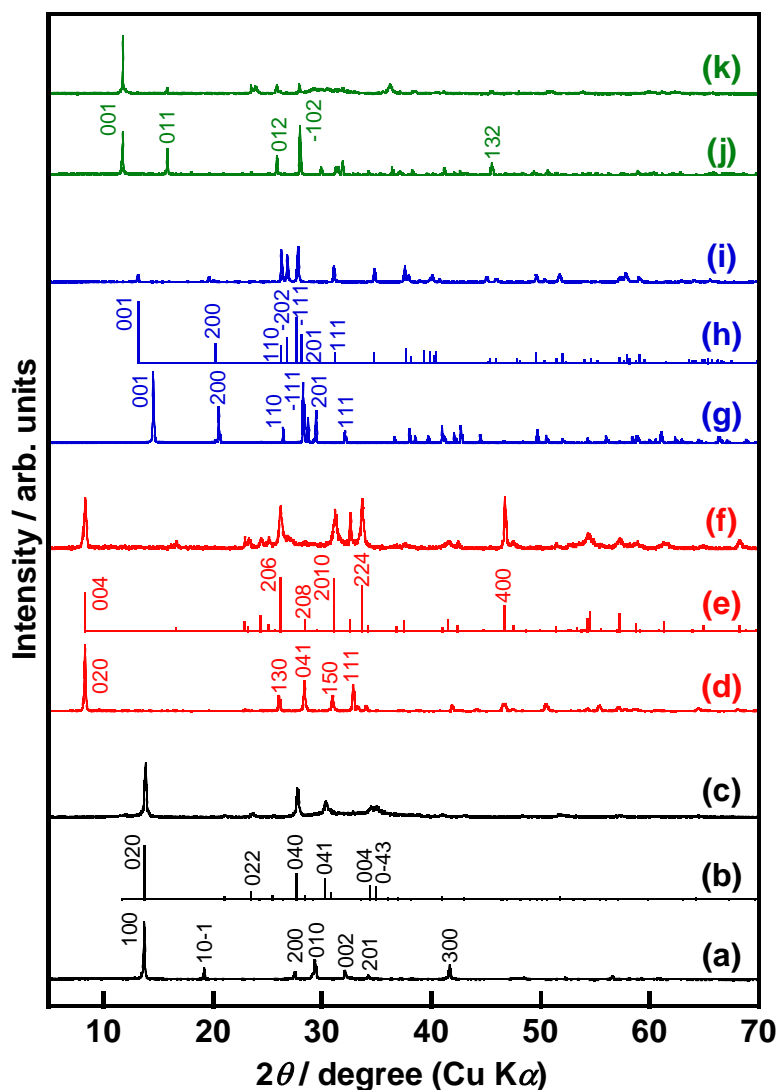

**Figure S5.** XRD patterns of (a)  $\text{K}_2\text{Ti}_2\text{O}_5$ , (b)  $\text{Ag}_2\text{Ti}_2\text{O}_5$  (PDF: 56-131), (c)  $\text{Ag(I)}\text{-K}_2\text{Ti}_2\text{O}_5$ , (d)  $\text{KLaNb}_2\text{O}_7$ , (e)  $\beta\text{-AgLaNb}_2\text{O}_7$  (PDF: 1-82-14), (f)  $\text{Ag(I)}\text{-KLaNb}_2\text{O}_7$ , (g)  $\text{LiVWO}_6$ , (h)  $\text{NaVWO}_6$  (PDF: 1-79-5682), (i)  $\text{Ag(I)}\text{-LiVWO}_6$ , (j)  $\text{KV}_3\text{O}_8$ , and (k)  $\text{Ag(I)}\text{-KV}_3\text{O}_8$ . Plane indices for  $\text{K}_2\text{Ti}_2\text{O}_5$ ,  $\text{KLaNb}_2\text{O}_7$ ,  $\text{LiVWO}_6$ , and  $\text{KV}_3\text{O}_8$  were referred to PDFs 51-1890, 1-81-1191, 1-78-5901, and 1-86-2495, respectively.

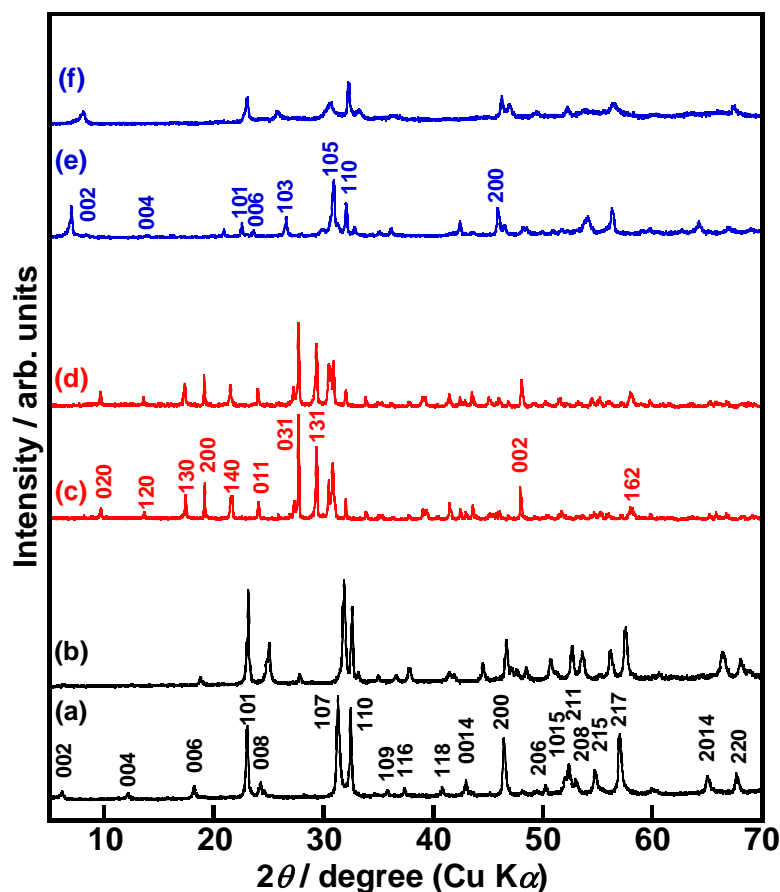

**Figure S6.** XRD patterns of (a)  $\text{K}_2\text{CaNaTa}_3\text{O}_{10}$ , (b)  $\text{Cu(I)-K}_2\text{CaNaTa}_3\text{O}_{10}$ , (c)  $\text{CsTi}_2\text{NbO}_7$ , (d)  $\text{Cu(I)-CsTi}_2\text{NbO}_7$ , (e)  $\text{K}_2\text{La}_{2/3}\text{Ta}_2\text{O}_7$ , and (f)  $\text{Cu(I)-K}_2\text{La}_{2/3}\text{Ta}_2\text{O}_7$ .  $\text{CuCl}$  was used as a flux for the synthesis of  $\text{Cu(I)-K}_2\text{CaNaTa}_3\text{O}_{10}$  and  $\text{Cu(I)-K}_2\text{La}_{2/3}\text{Ta}_2\text{O}_7$ .  $\text{CuCl-CuI}$  was used as a flux for the synthesis of  $\text{Cu(I)-CsTi}_2\text{NbO}_7$ . Plane indices for  $\text{K}_2\text{CaNaTa}_3\text{O}_{10}$ ,  $\text{K}_2\text{La}_{2/3}\text{Ta}_2\text{O}_7$ , and  $\text{CsTi}_2\text{NbO}_7$  were referred to PDF 1-70-6006, 1-72-5958, and 1-73-680, respectively.

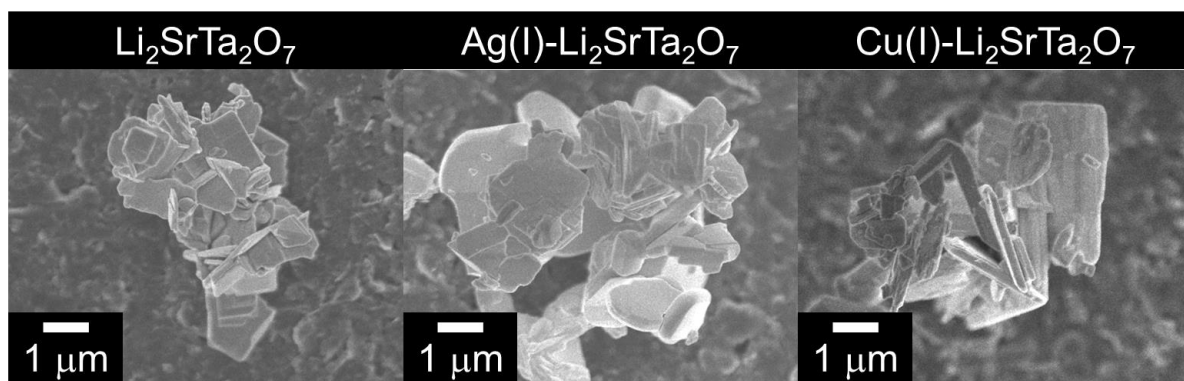

**Figure S7.** SEM images of  $\text{Li}_2\text{SrTa}_2\text{O}_7$ ,  $\text{Ag(I)-Li}_2\text{SrTa}_2\text{O}_7$ , and  $\text{Cu(I)-Li}_2\text{SrTa}_2\text{O}_7$ .

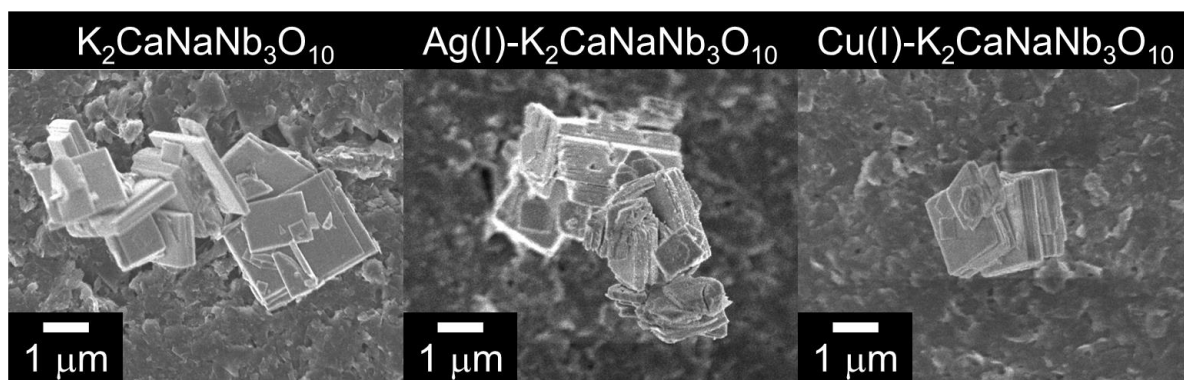

**Figure S8.** SEM images of  $\text{K}_2\text{CaNaNb}_3\text{O}_{10}$ ,  $\text{Ag(I)-K}_2\text{CaNaNb}_3\text{O}_{10}$ , and  $\text{Cu(I)-K}_2\text{CaNaNb}_3\text{O}_{10}$ .

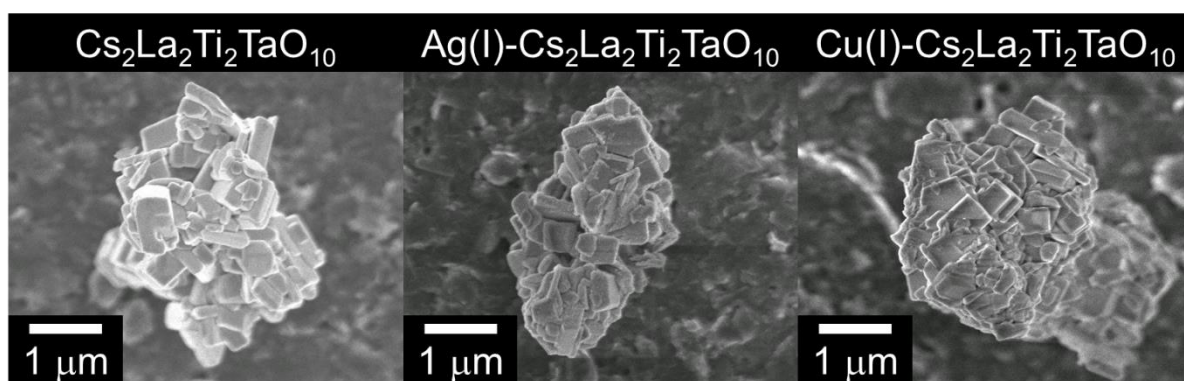

**Figure S9.** SEM images of  $\text{Cs}_2\text{La}_2\text{Ti}_2\text{TaO}_{10}$ ,  $\text{Ag(I)-Cs}_2\text{La}_2\text{Ti}_2\text{TaO}_{10}$ , and  $\text{Cu(I)-Cs}_2\text{La}_2\text{Ti}_2\text{TaO}_{10}$ .



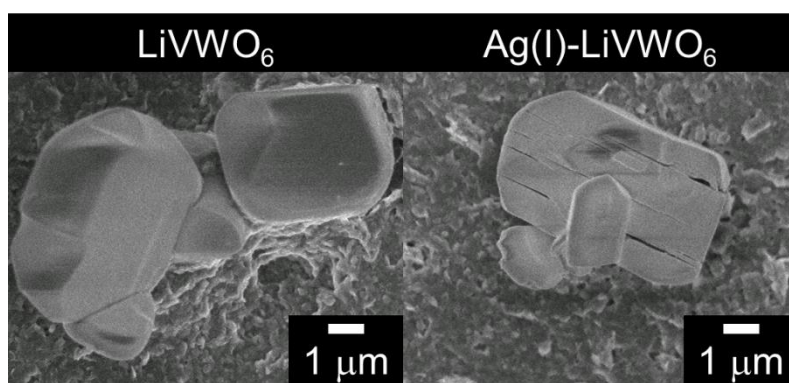

**Figure S10.** SEM images of LiVWO<sub>6</sub> and Ag(I)-LiVWO<sub>6</sub>.

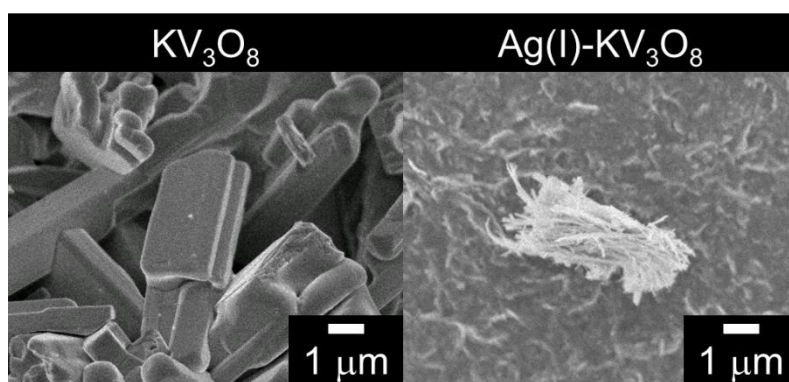

**Figure S11.** SEM images of KV<sub>3</sub>O<sub>8</sub> and Ag(I)-KV<sub>3</sub>O<sub>8</sub>.

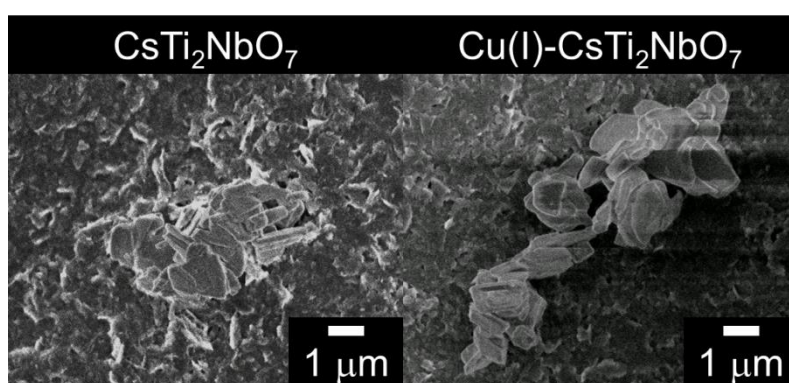

**Figure S12.** SEM images of CsTi<sub>2</sub>NbO<sub>7</sub> and Cu(I)-CsTi<sub>2</sub>NbO<sub>7</sub>.

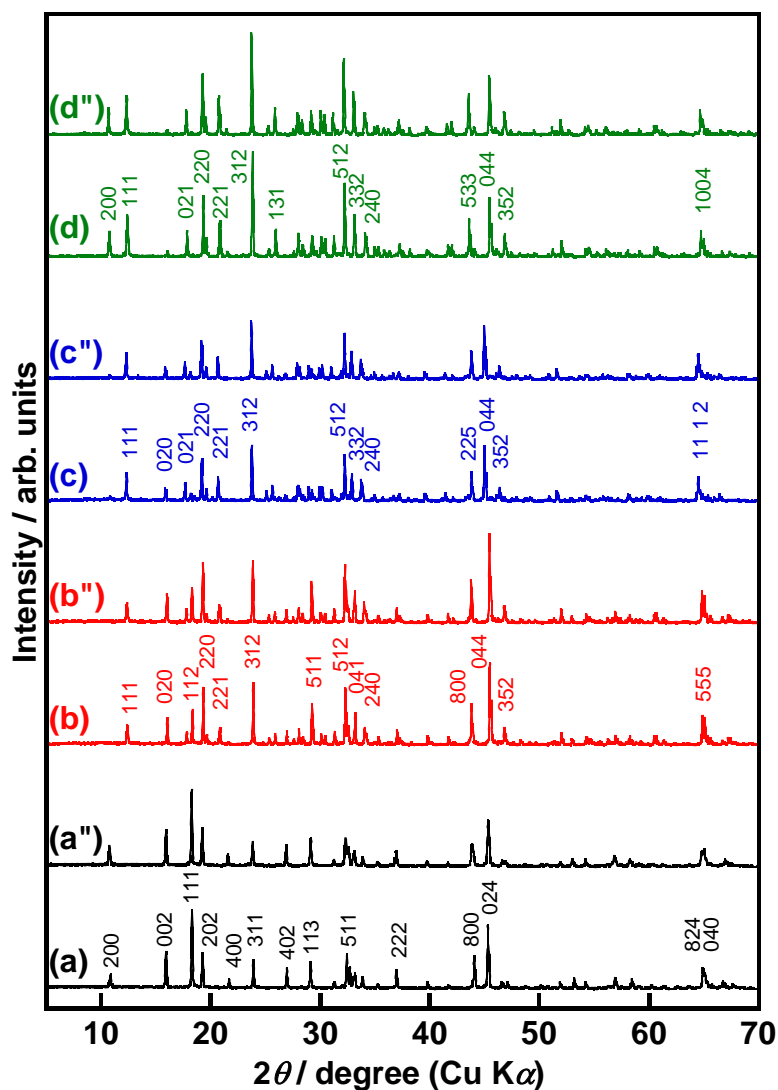

**Figure S13.** XRD patterns of metal oxides possessing a tunneling structure with and without molten salt treatments. Host materials and their Cu(I)-ion-exchanged materials were labeled as (x) and (x''), respectively. (a)  $\text{Li}_2\text{Na}_2\text{Ti}_6\text{O}_{14}$ , (b)  $\text{Li}_2\text{SrTi}_6\text{O}_{14}$ , (c)  $\text{Li}_2\text{BaTi}_6\text{O}_{14}$ , and (d)  $\text{Li}_2\text{PbTi}_6\text{O}_{14}$ . CuCl-CuI mixture was used as a flux for the synthesis of all Cu(I)-substituted materials. Plane indices for  $\text{Li}_2\text{Na}_2\text{Ti}_6\text{O}_{14}$ ,  $\text{Li}_2\text{SrTi}_6\text{O}_{14}$ ,  $\text{Li}_2\text{BaTi}_6\text{O}_{14}$ , and  $\text{Li}_2\text{PbTi}_6\text{O}_{14}$  were referred to PDFs 52-690, 1-72-6072, 1-74-8154, and 1-74-8153, respectively.

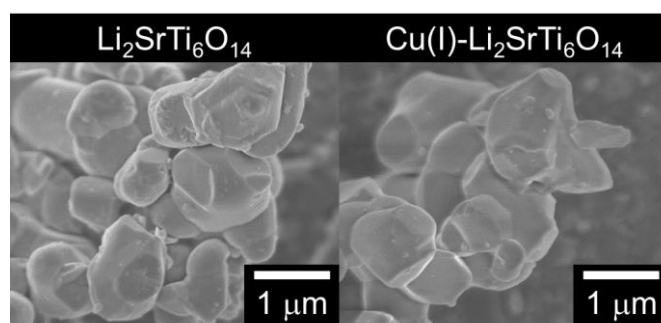

**Figure S14.** SEM images of  $\text{Li}_2\text{SrTi}_6\text{O}_{14}$  and  $\text{Cu(I)-Li}_2\text{SrTi}_6\text{O}_{14}$ .

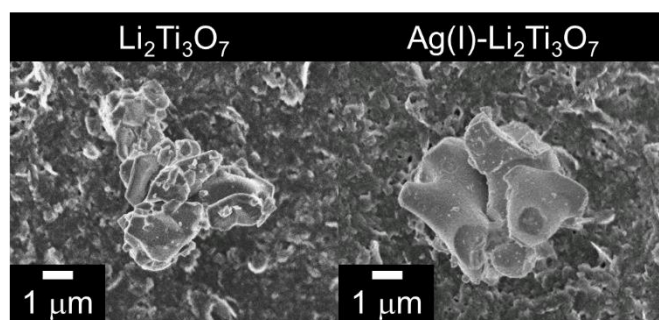

**Figure S15.** SEM images  $\text{Li}_2\text{Ti}_3\text{O}_7$  and  $\text{Ag(I)-Li}_2\text{Ti}_3\text{O}_7$ .

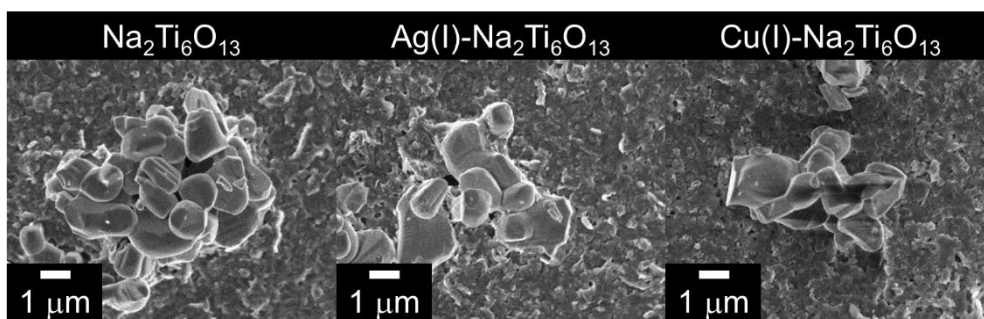

**Figure S16.** SEM images of  $\text{Na}_2\text{Ti}_6\text{O}_{13}$ ,  $\text{Ag(I)-Na}_2\text{Ti}_6\text{O}_{13}$ , and  $\text{Cu(I)-Na}_2\text{Ti}_6\text{O}_{13}$ .

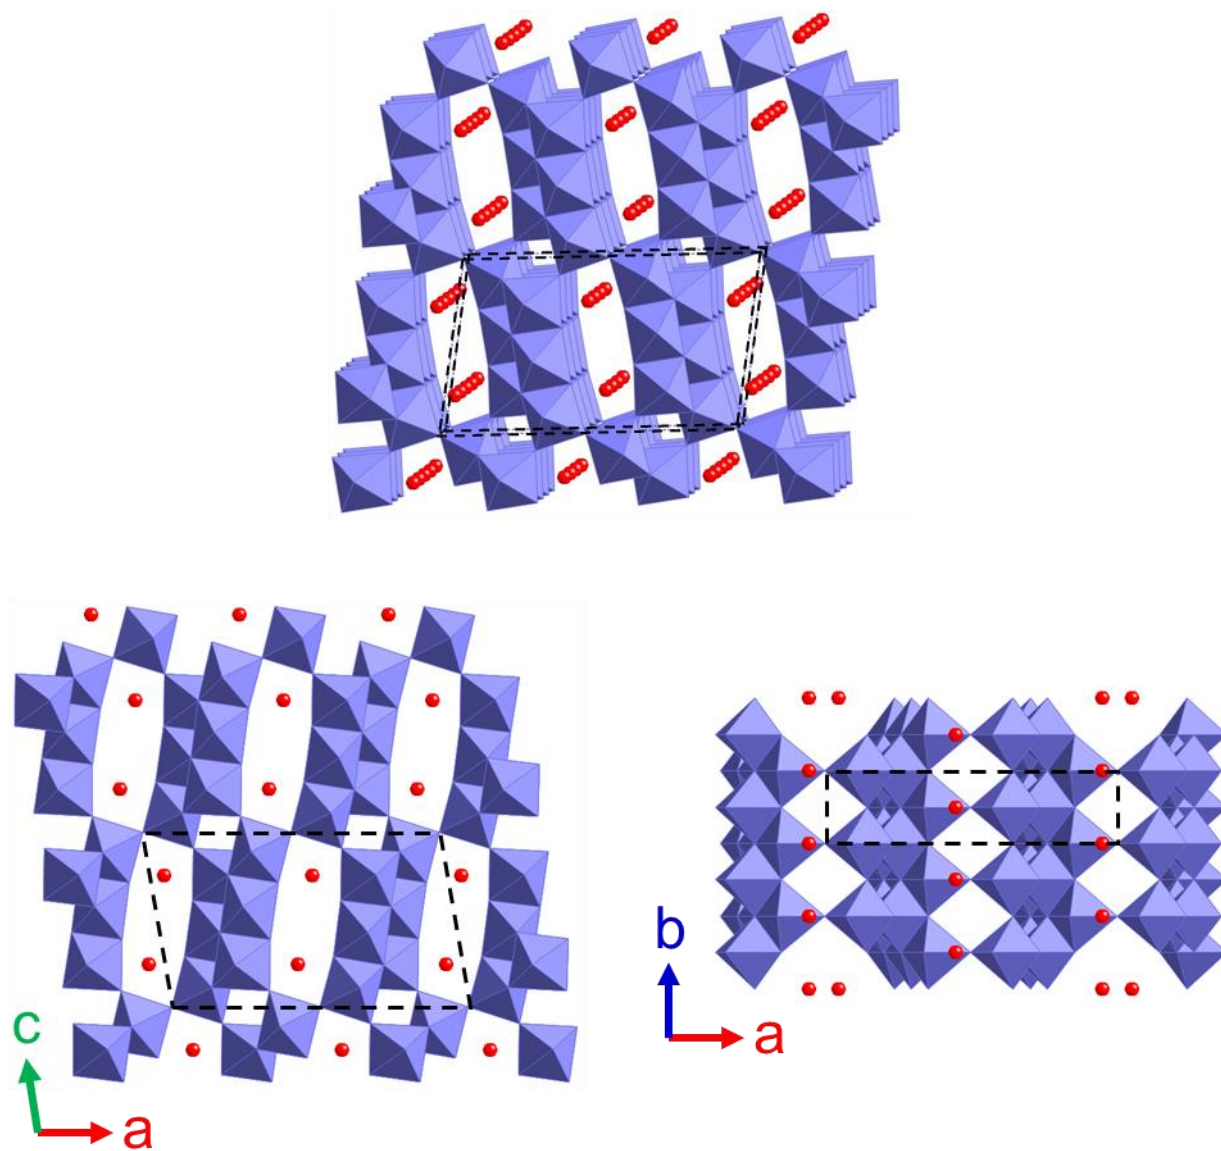

**Figure S17.** Crystal structure of  $\text{Li}_2\text{Ti}_6\text{O}_{13}$  with a tunneling structure. Red spheres and blue octahedra indicate  $\text{Li}^+$  and  $\text{TiO}_6$ , respectively.

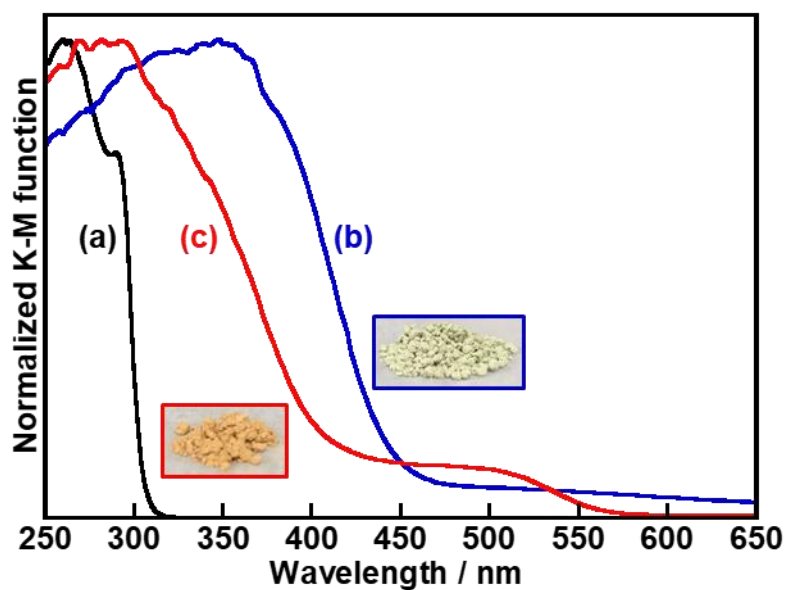

**Figure S18.** Diffuse reflectance spectra of (a)  $\text{Li}_2\text{SrTa}_2\text{O}_7$ , (b)  $\text{Ag(I)-Li}_2\text{SrTa}_2\text{O}_7$ , and (c)  $\text{Cu(I)-Li}_2\text{SrTa}_2\text{O}_7$ , and photographs of  $\text{Ag(I)-Li}_2\text{SrTa}_2\text{O}_7$  (red frame) and  $\text{Cu(I)-Li}_2\text{SrTa}_2\text{O}_7$  (blue frame).

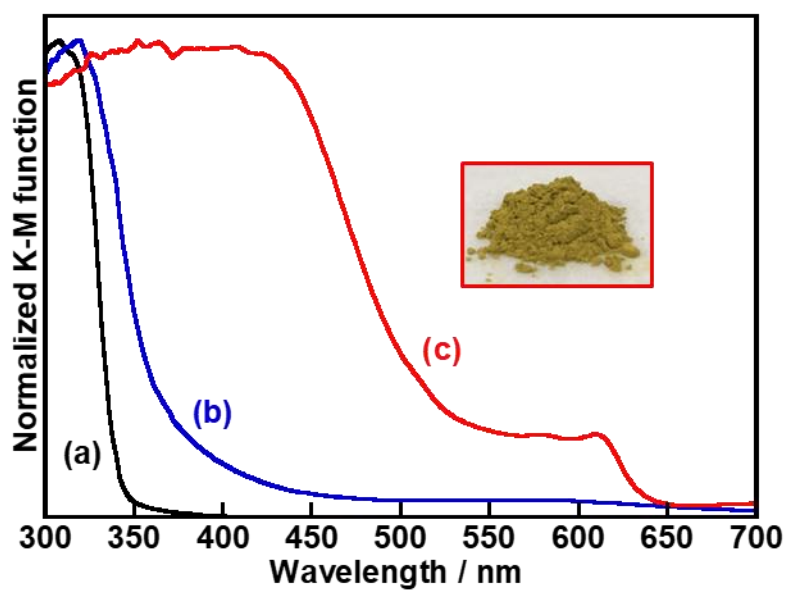

**Figure S19.** Diffuse reflectance spectra of (a)  $\text{K}_2\text{La}_2\text{Ti}_3\text{O}_{10}$ , (b)  $\text{Ag(I)-K}_2\text{La}_2\text{Ti}_3\text{O}_{10}$ , and (c)  $\text{Cu(I)-K}_2\text{La}_2\text{Ti}_3\text{O}_{10}$ , and a photograph of  $\text{Cu(I)-K}_2\text{La}_2\text{Ti}_3\text{O}_{10}$ .

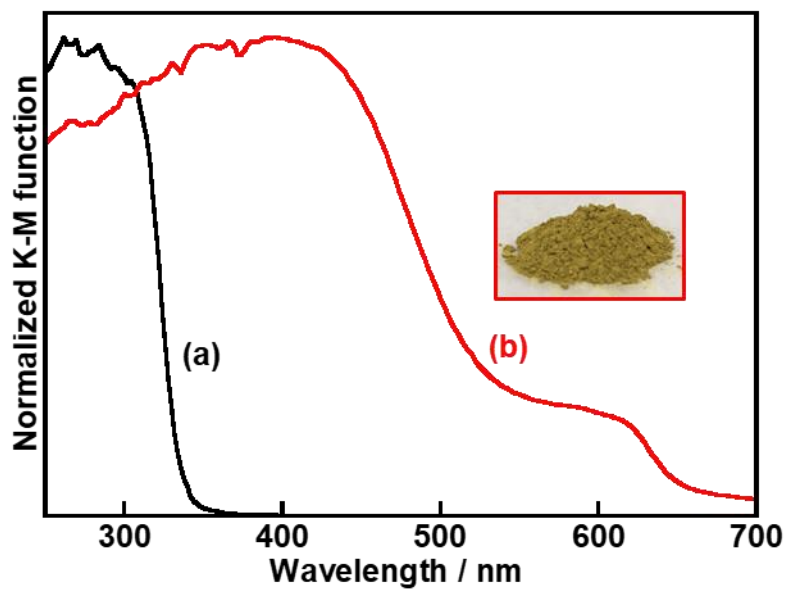

**Figure S20.** Diffuse reflectance spectra of (a)  $\text{Na}_2\text{La}_2\text{Ti}_3\text{O}_{10}$  and (b)  $\text{Cu(I)-Na}_2\text{La}_2\text{Ti}_3\text{O}_{10}$ , and a photograph of  $\text{Cu(I)-Na}_2\text{La}_2\text{Ti}_3\text{O}_{10}$ .

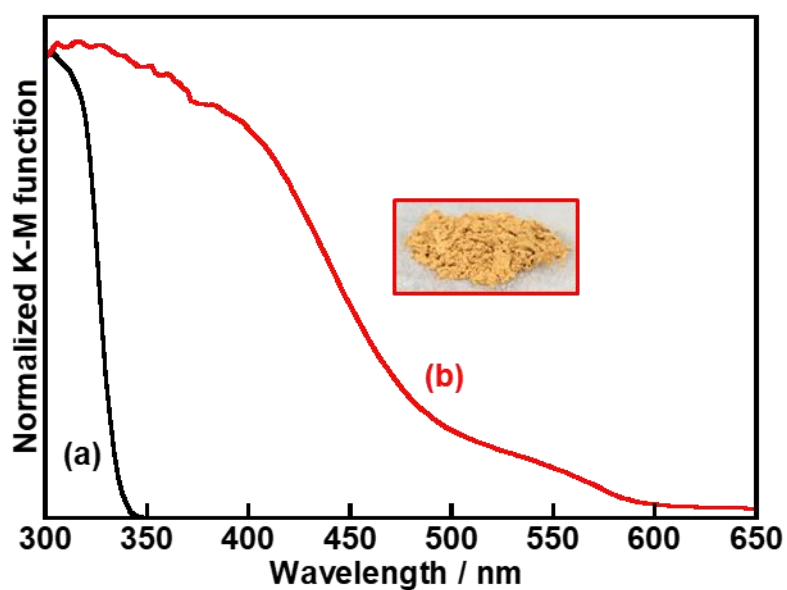

**Figure S21.** Diffuse reflectance spectra of (a)  $\text{Li}_2\text{La}_2\text{Ti}_3\text{O}_{10}$  and (b)  $\text{Cu(I)-Li}_2\text{La}_2\text{Ti}_3\text{O}_{10}$ , and a photograph of  $\text{Cu(I)-Li}_2\text{La}_2\text{Ti}_3\text{O}_{10}$ .

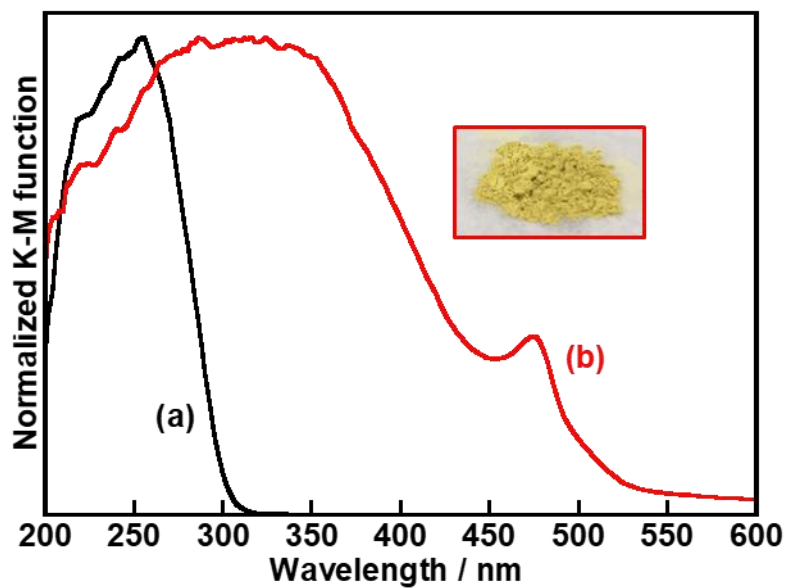

**Figure S22.** Diffuse reflectance spectra of (a) K<sub>2</sub>CaNaTa<sub>3</sub>O<sub>10</sub> and (b) Cu(I)-K<sub>2</sub>CaNaTa<sub>3</sub>O<sub>10</sub>, and a photograph of Cu(I)-K<sub>2</sub>CaNaTa<sub>3</sub>O<sub>10</sub>.

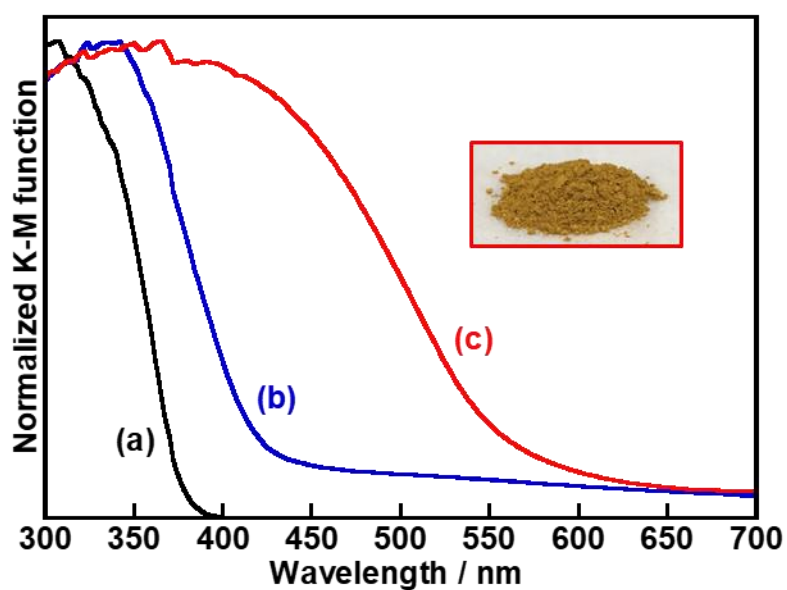

**Figure S23.** Diffuse reflectance spectra of (a) K<sub>2</sub>CaNaNb<sub>3</sub>O<sub>10</sub>, (b) Ag(I)-K<sub>2</sub>CaNaNb<sub>3</sub>O<sub>10</sub>, and (c) Cu(I)-K<sub>2</sub>CaNaNb<sub>3</sub>O<sub>10</sub>, and a photograph of Cu(I)-K<sub>2</sub>CaNaNb<sub>3</sub>O<sub>10</sub>.



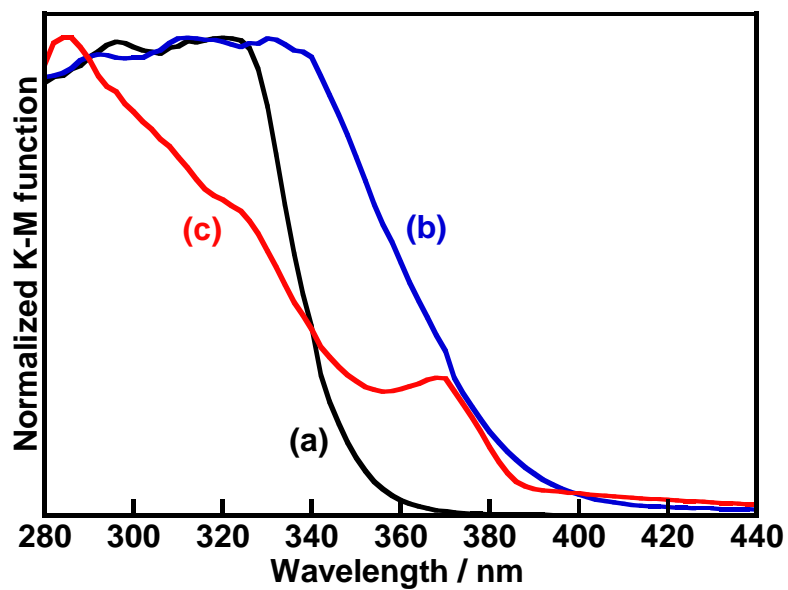

**Figure S24.** Diffuse reflectance spectra of (a)  $\text{KCa}_2\text{Nb}_3\text{O}_{10}$ , (b)  $\text{Ag(I)-KCa}_2\text{Nb}_3\text{O}_{10}$ , and (c)  $\text{Cu(I)-KCa}_2\text{Nb}_3\text{O}_{10}$ .

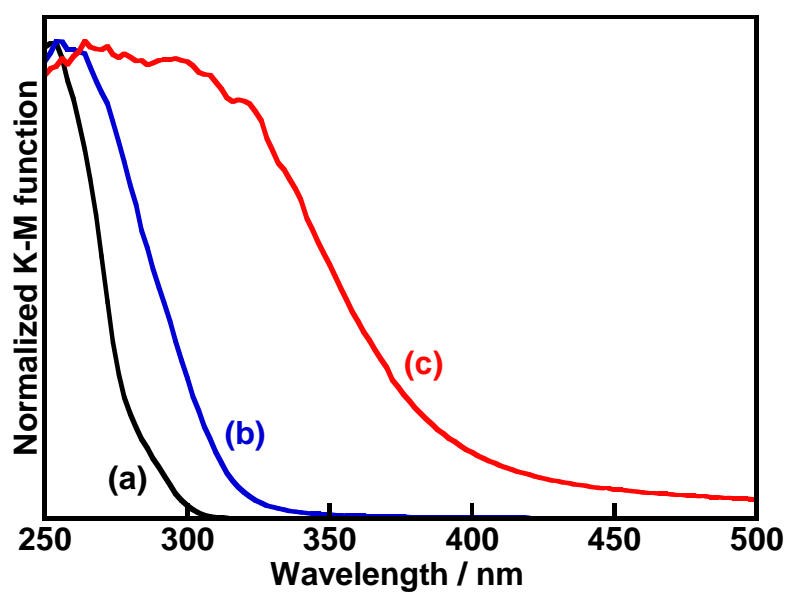

**Figure S25.** Diffuse reflectance spectra of (a)  $\text{CsSr}_2\text{Ta}_3\text{O}_{10}$ , (b)  $\text{Ag(I)-CsSr}_2\text{Ta}_3\text{O}_{10}$ , and (c)  $\text{Cu(I)-CsSr}_2\text{Ta}_3\text{O}_{10}$ .



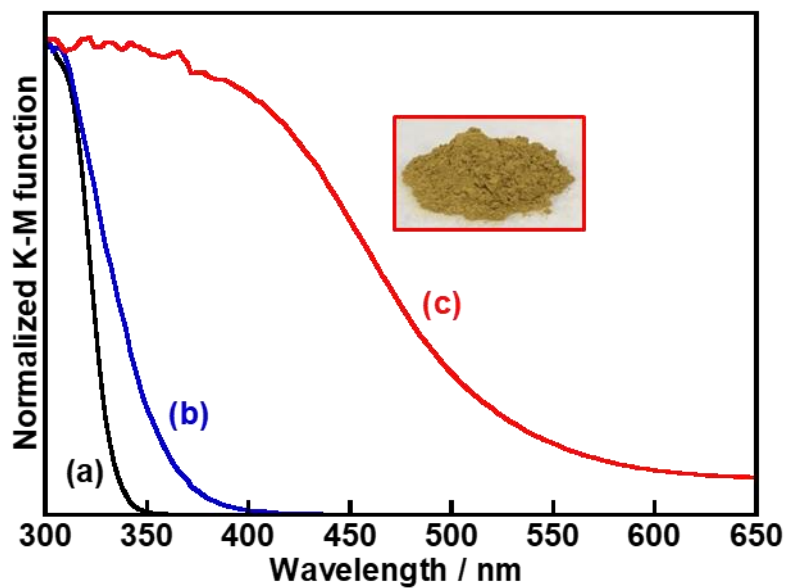

**Figure S26.** Diffuse reflectance spectra of (a)  $\text{CsLa}_2\text{Ti}_2\text{TaO}_{10}$ , (b)  $\text{Ag(I)-CsLa}_2\text{Ti}_2\text{TaO}_{10}$ , and (c)  $\text{Cu(I)-CsLa}_2\text{Ti}_2\text{TaO}_{10}$ , and a photograph of  $\text{Cu(I)-CsLa}_2\text{Ti}_2\text{TaO}_{10}$ .

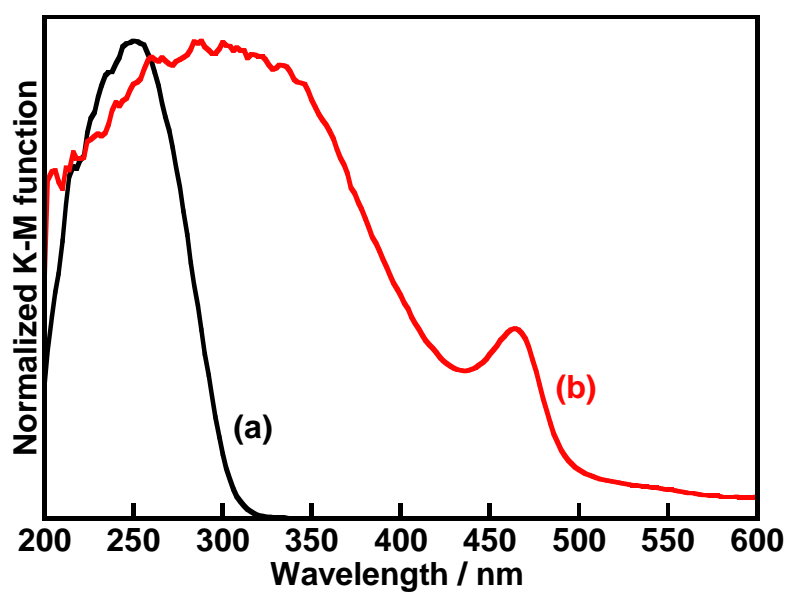

**Figure S27.** Diffuse reflectance spectra of (a)  $\text{K}_2\text{La}_{2/3}\text{Ta}_2\text{O}_7$  and (b)  $\text{Cu(I)-K}_2\text{La}_{2/3}\text{Ta}_2\text{O}_7$ .

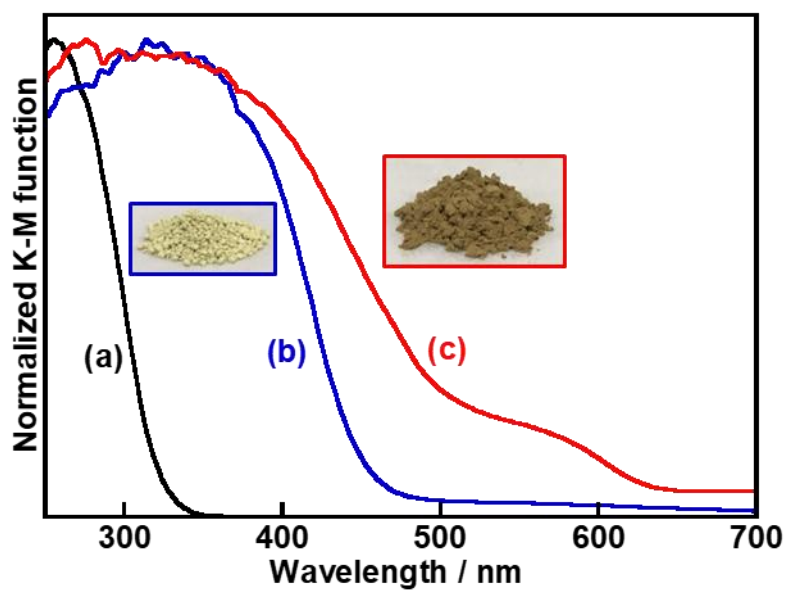

**Figure S28.** Diffuse reflectance spectra of (a)  $\text{K}_2\text{SrNb}_{0.2}\text{Ta}_{1.8}\text{O}_7$ , (b)  $\text{Ag(I)-K}_2\text{SrNb}_{0.2}\text{Ta}_{1.8}\text{O}_7$ , and (c)  $\text{Cu(I)-K}_2\text{SrNb}_{0.2}\text{Ta}_{1.8}\text{O}_7$ , and photographs of  $\text{Ag(I)-K}_2\text{SrNb}_{0.2}\text{Ta}_{1.8}\text{O}_7$  (red frame) and  $\text{Cu(I)-K}_2\text{SrNb}_{0.2}\text{Ta}_{1.8}\text{O}_7$  (blue frame).

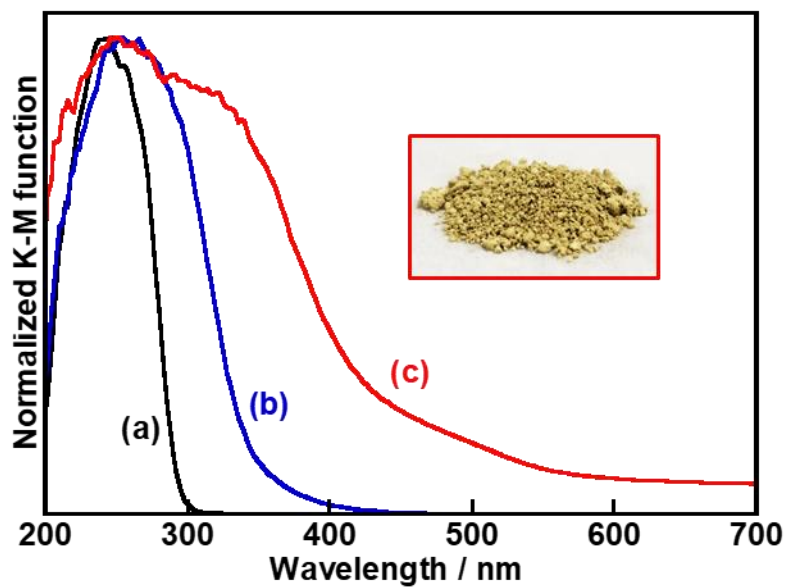

**Figure S29.** Diffuse reflectance spectra of (a)  $\text{KLaTa}_2\text{O}_7$ , (b)  $\text{Ag(I)-KLaTa}_2\text{O}_7$ , and (c)  $\text{Cu(I)-KLaTa}_2\text{O}_7$ , and a photograph of  $\text{Cu(I)-KLaTa}_2\text{O}_7$ .

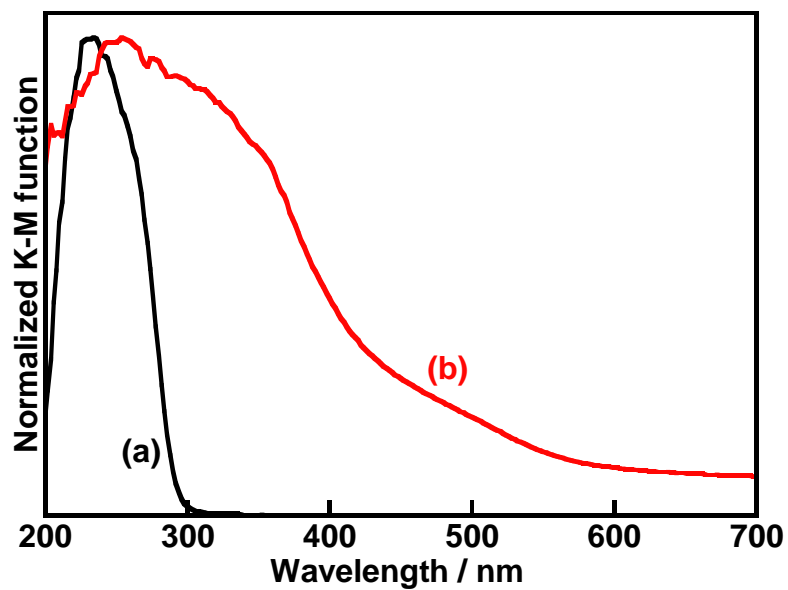

**Figure S30.** Diffuse reflectance spectra of (a)  $\text{RbLaTa}_2\text{O}_7$  and (b)  $\text{Cu(I)-RbLaTa}_2\text{O}_7$ .

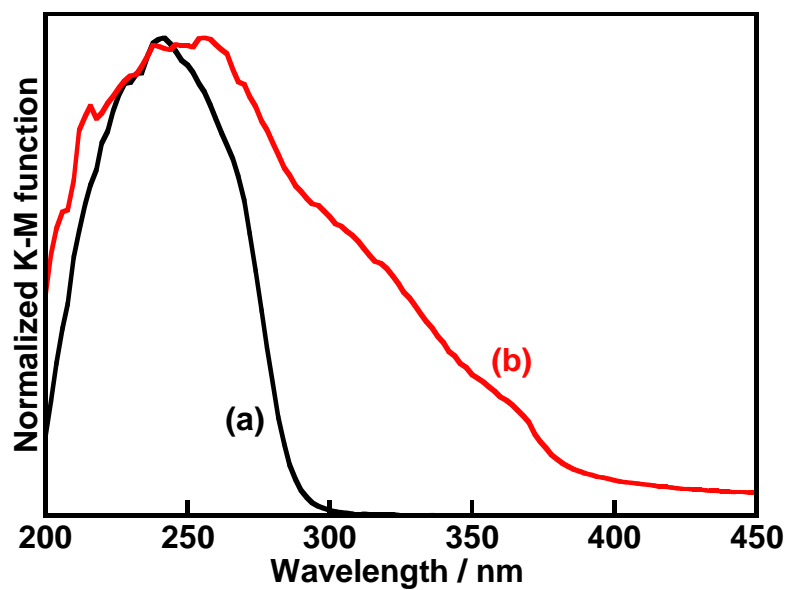

**Figure S31.** Diffuse reflectance spectra of (a)  $\text{LiLaTa}_2\text{O}_7$  and (b)  $\text{Cu(I)-LiLaTa}_2\text{O}_7$ .

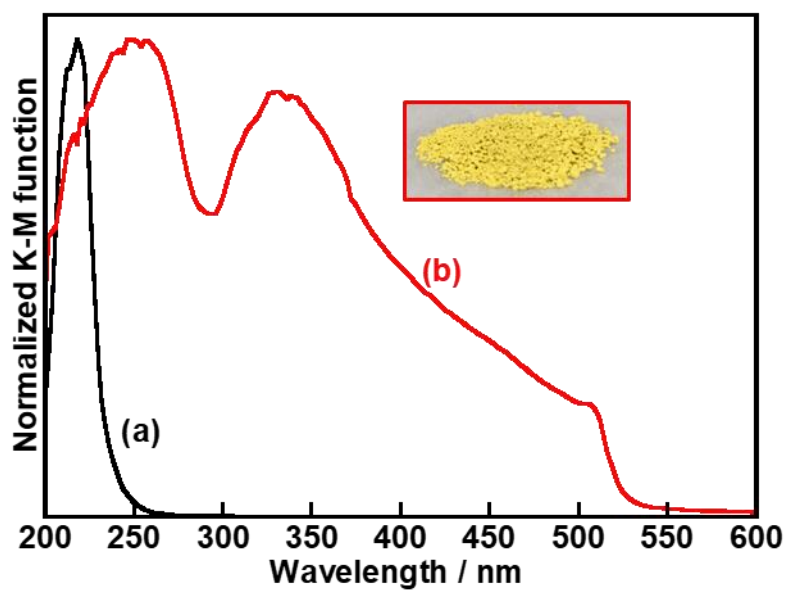

**Figure S32.** Diffuse reflectance spectra of (a)  $\text{Li}_2\text{SnO}_3$  and (b)  $\text{Cu(I)-Li}_2\text{SnO}_3$ , and a photograph of  $\text{Cu(I)-Li}_2\text{SnO}_3$ .

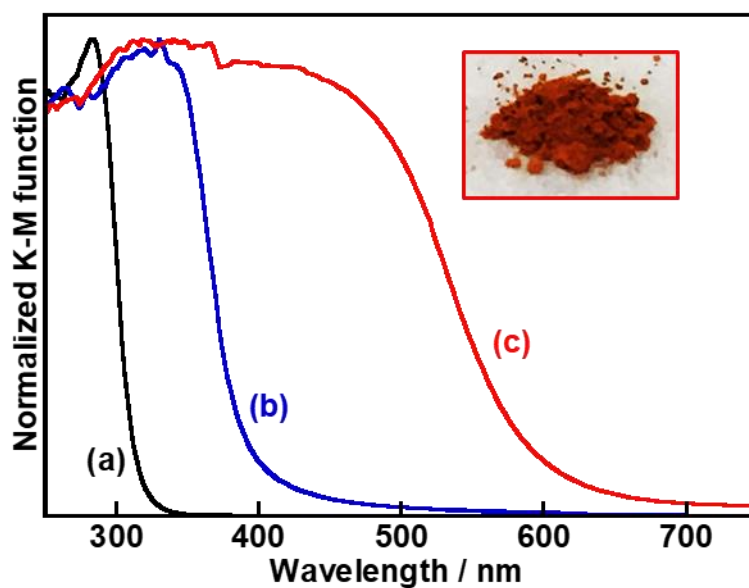

**Figure S33.** Diffuse reflectance spectra of (a)  $\text{K}_{0.8}\text{Mg}_{0.4}\text{Ti}_{1.6}\text{O}_4$ , (b)  $\text{Ag(I)-K}_{0.8}\text{Mg}_{0.4}\text{Ti}_{1.6}\text{O}_4$ , and (c)  $\text{Cu(I)-K}_{0.8}\text{Mg}_{0.4}\text{Ti}_{1.6}\text{O}_4$ , and a photograph of  $\text{Cu(I)-K}_{0.8}\text{Mg}_{0.4}\text{Ti}_{1.6}\text{O}_4$ .

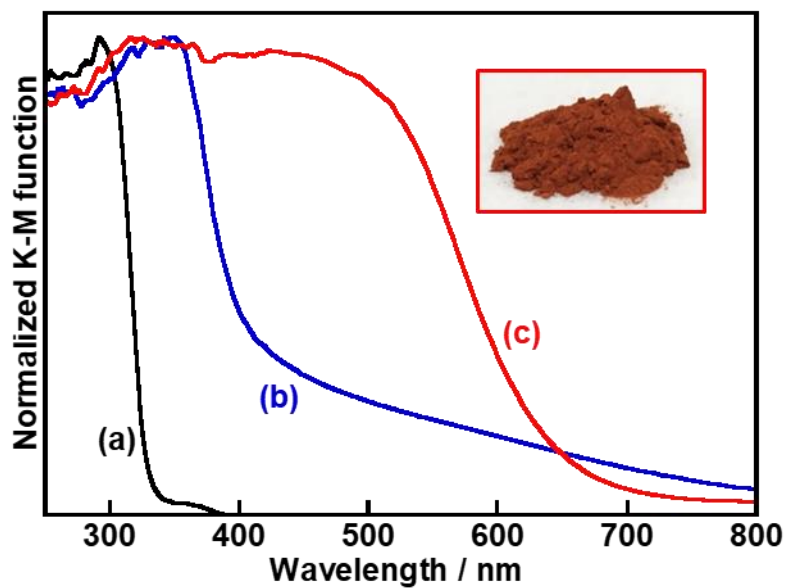

**Figure S34.** Diffuse reflectance spectra of (a)  $\text{K}_{0.8}\text{Zn}_{0.4}\text{Ti}_{1.6}\text{O}_4$ , (b)  $\text{Ag(I)}\text{-K}_{0.8}\text{Zn}_{0.4}\text{Ti}_{1.6}\text{O}_4$ , and (c)  $\text{Cu(I)}\text{-K}_{0.8}\text{Zn}_{0.4}\text{Ti}_{1.6}\text{O}_4$ , and a photograph of  $\text{Cu(I)}\text{-K}_{0.8}\text{Zn}_{0.4}\text{Ti}_{1.6}\text{O}_4$ .

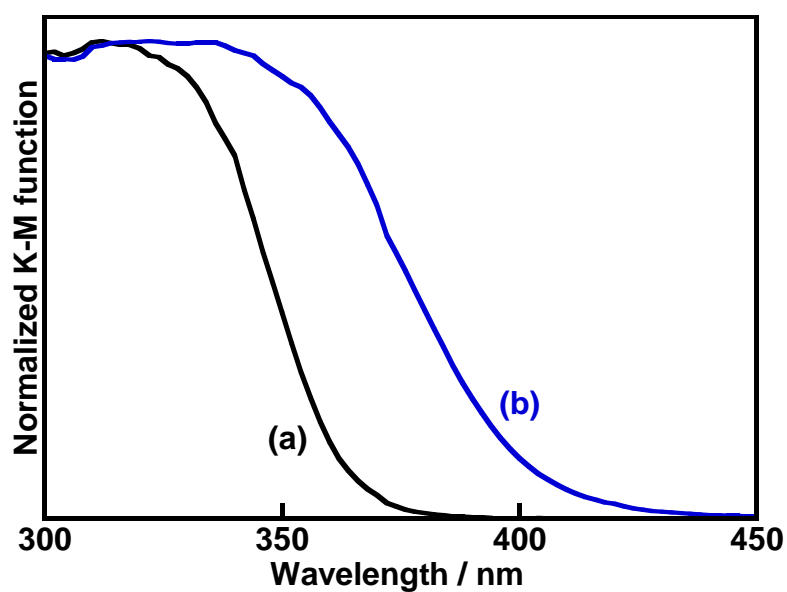

**Figure S35.** Diffuse reflectance spectra of (a)  $\text{KLaNb}_2\text{O}_7$  and (b)  $\text{Ag(I)}\text{-KLaNb}_2\text{O}_7$ .

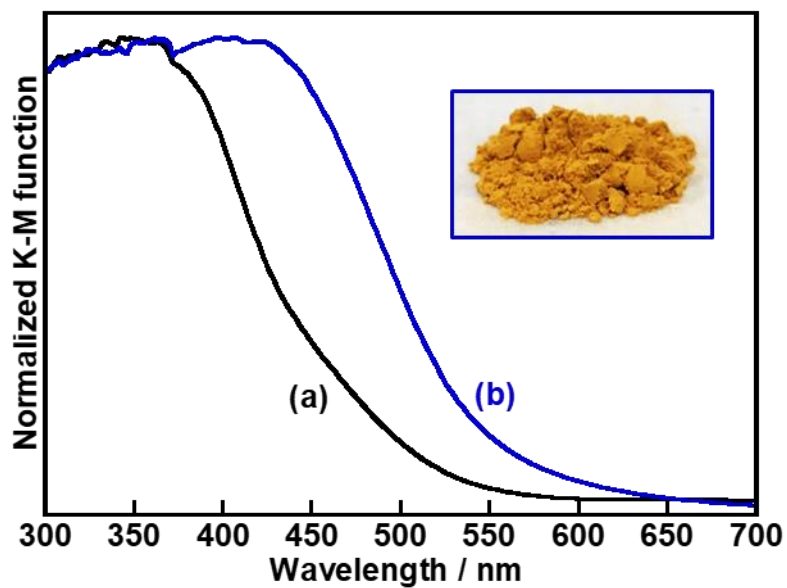

**Figure S36.** Diffuse reflectance spectra of (a)  $\text{LiVWO}_6$  and (b)  $\text{Ag(I)-LiVWO}_6$ , and a photograph of  $\text{Ag(I)-LiVWO}_6$ .

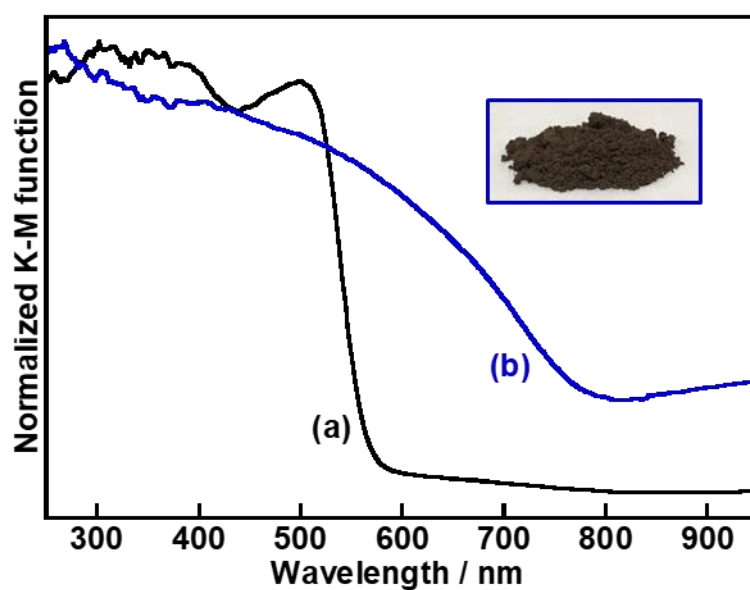

**Figure S37.** Diffuse reflectance spectra of (a)  $\text{KV}_3\text{O}_8$  and (b)  $\text{Ag(I)-KV}_3\text{O}_8$ , and a photograph of  $\text{Ag(I)-KV}_3\text{O}_8$ .

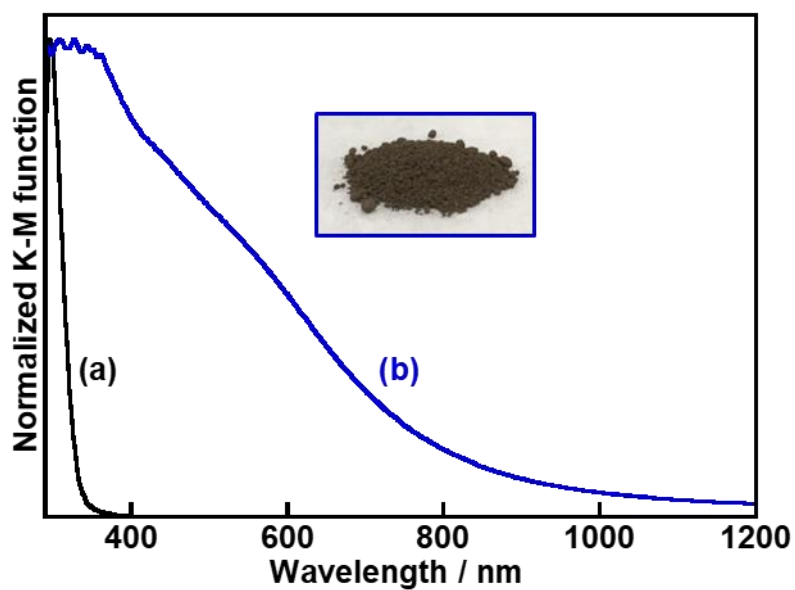

**Figure S38.** Diffuse reflectance spectra of (a) K<sub>2</sub>Ti<sub>2</sub>O<sub>5</sub> and (b) Ag(I)-K<sub>2</sub>Ti<sub>2</sub>O<sub>5</sub>, and a photograph of Ag(I)-K<sub>2</sub>Ti<sub>2</sub>O<sub>5</sub>.

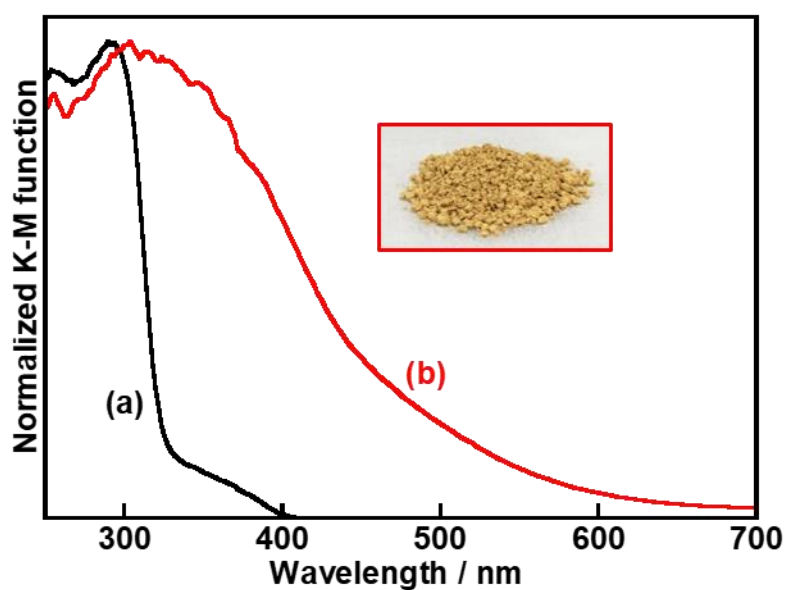

**Figure S39.** Diffuse reflectance spectra of (a) CsTi<sub>2</sub>NbO<sub>7</sub> and (b) Cu(I)-CsTi<sub>2</sub>NbO<sub>7</sub>, and a photograph of Cu(I)-CsTi<sub>2</sub>NbO<sub>7</sub>.

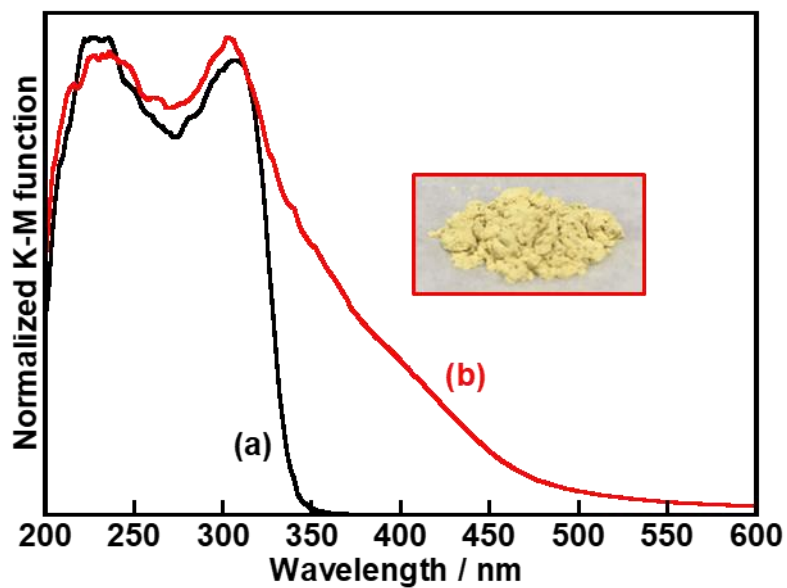

**Figure S40.** Diffuse reflectance spectra of (a)  $\text{Li}_2\text{Na}_2\text{Ti}_6\text{O}_{14}$  and (b)  $\text{Cu(I)-Li}_2\text{Na}_2\text{Ti}_6\text{O}_{14}$ , and a photograph of  $\text{Cu(I)-Li}_2\text{Na}_2\text{Ti}_6\text{O}_{14}$ .

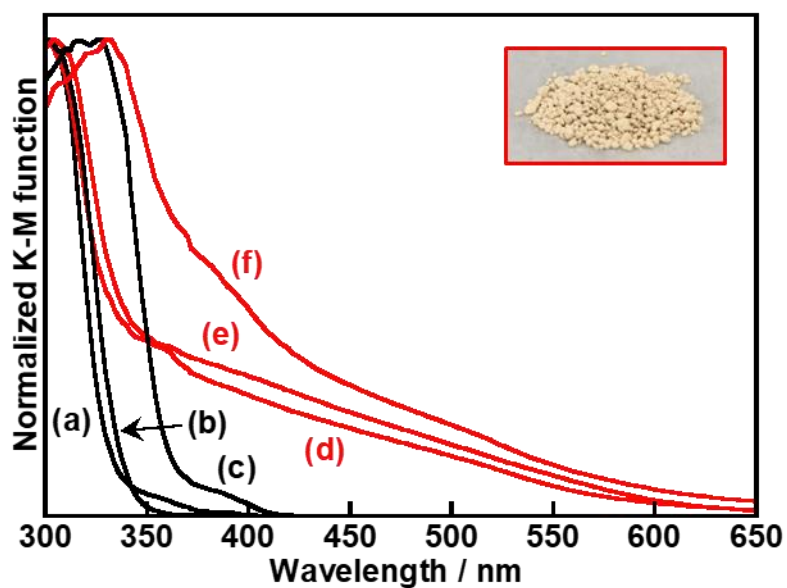

**Figure S41.** Diffuse reflectance spectra of (a)  $\text{Li}_2\text{SrTi}_6\text{O}_{14}$ , (b)  $\text{Li}_2\text{BaTi}_6\text{O}_{14}$ , (c)  $\text{Li}_2\text{PbTi}_6\text{O}_{14}$ , (d)  $\text{Cu(I)-Li}_2\text{SrTi}_6\text{O}_{14}$ , (e)  $\text{Cu(I)-Li}_2\text{BaTi}_6\text{O}_{14}$ , and (f)  $\text{Cu(I)-Li}_2\text{PbTi}_6\text{O}_{14}$ , and a photograph of  $\text{Cu(I)-Li}_2\text{SrTi}_6\text{O}_{14}$ .



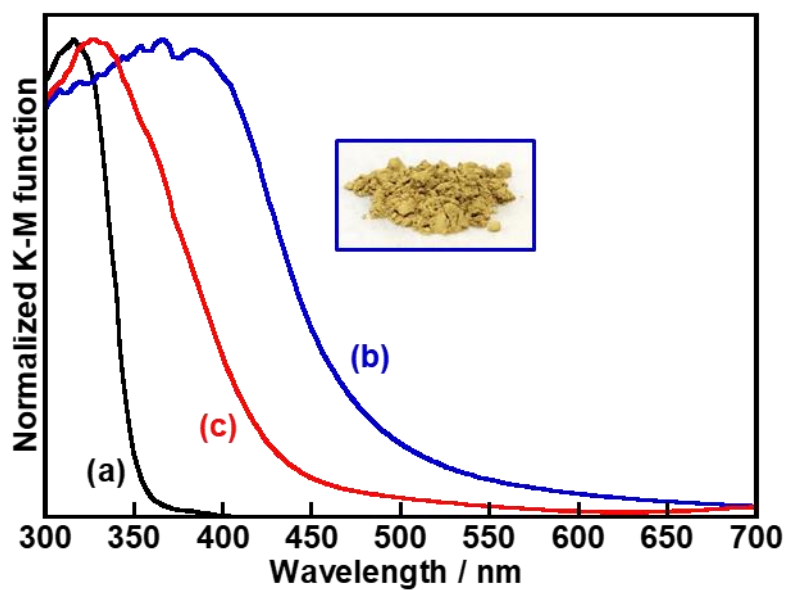

**Figure S42.** Diffuse reflectance spectra of (a)  $\text{Li}_2\text{Ti}_3\text{O}_7$ , (b)  $\text{Ag(I)-Li}_2\text{Ti}_3\text{O}_7$ , and (c)  $\text{Cu(I)-Li}_2\text{Ti}_3\text{O}_7$ , and a photograph of  $\text{Ag(I)-Li}_2\text{Ti}_3\text{O}_7$ .

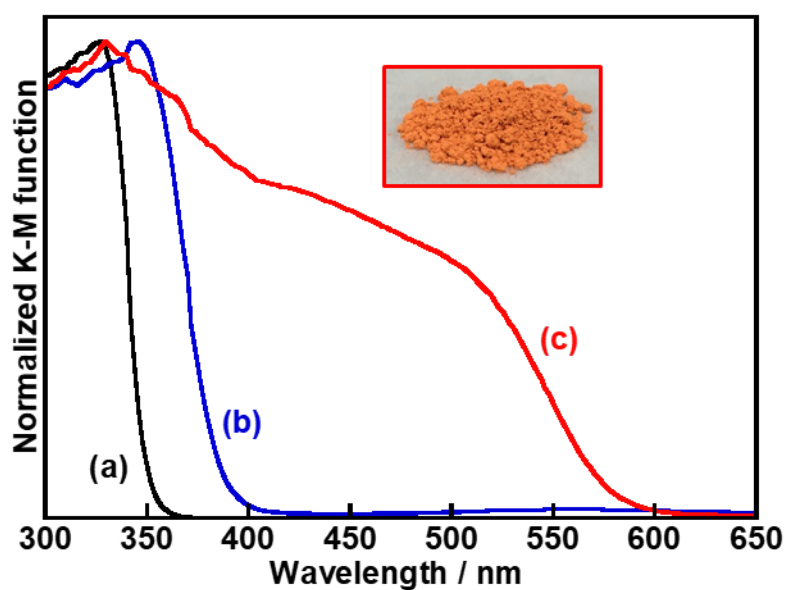

**Figure S43.** Diffuse reflectance spectra of (a)  $\text{Na}_2\text{Ti}_6\text{O}_{13}$ , (b)  $\text{Ag(I)-Na}_2\text{Ti}_6\text{O}_{13}$ , and (c)  $\text{Cu(I)-Na}_2\text{Ti}_6\text{O}_{13}$ , and a photograph of  $\text{Cu(I)-Na}_2\text{Ti}_6\text{O}_{13}$ .

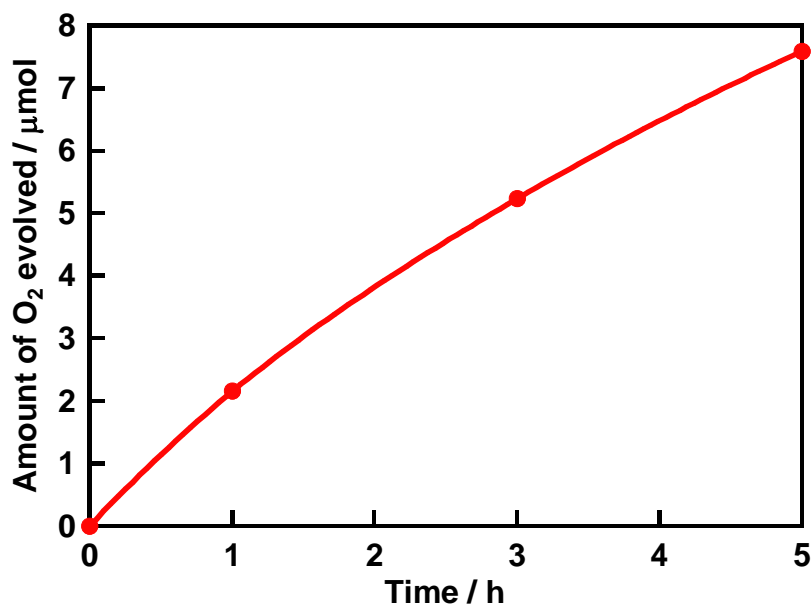

**Figure S44.** Photocatalytic O<sub>2</sub> evolution over Ag(I)-K<sub>2</sub>SrTa<sub>2</sub>O<sub>7</sub> from an aqueous AgNO<sub>3</sub> solution under visible light irradiation. Photocatalyst: 0.5 g, reactant solution: 20 mmol L<sup>-1</sup> AgNO<sub>3</sub> aq. (120 mL), cell: top-irradiation cell with a Pyrex window, light source: 300 W Xe-arc lamp with a long-pass filter (HOYA: L42).

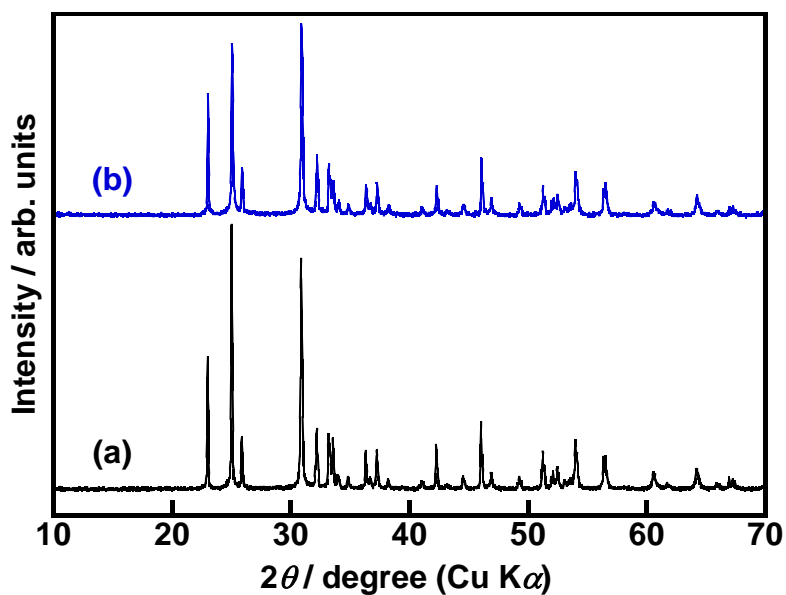

**Figure S45.** XRD patterns of Ag(I)-K<sub>2</sub>SrTa<sub>2</sub>O<sub>7</sub> (a) before and (b) after photocatalytic O<sub>2</sub> evolution from an aqueous AgNO<sub>3</sub> solution under visible light irradiation for 5 h in Figure S44.

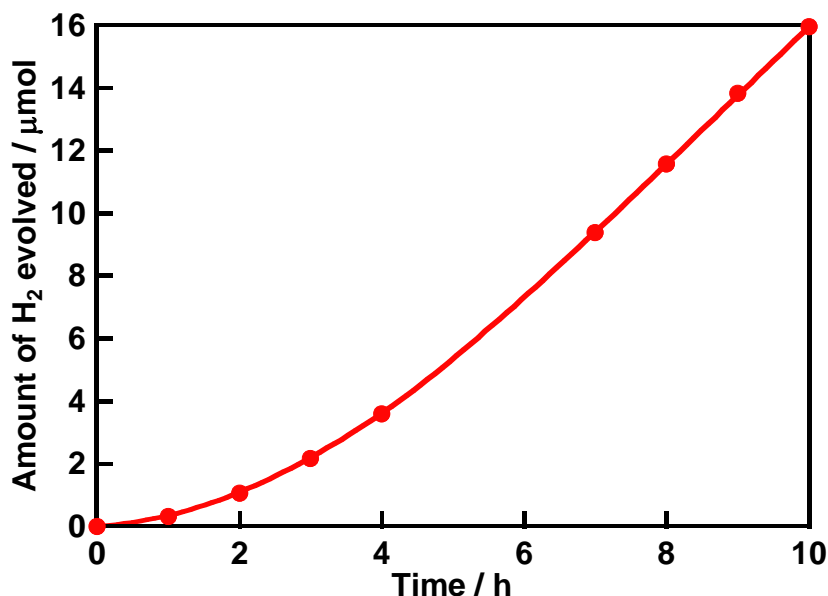

**Figure S46.** Photocatalytic H<sub>2</sub> evolution over Rh(0.3wt%)/Cu(I)-Li<sub>2</sub>SrTi<sub>6</sub>O<sub>14</sub> from an aqueous solution containing sacrificial reagents under visible light irradiation. Photocatalyst: 0.3 g, cocatalyst: photodeposition (*in situ*), reactant solution: 0.5 mol L<sup>-1</sup> K<sub>2</sub>SO<sub>3</sub> + 0.1 mol L<sup>-1</sup> Na<sub>2</sub>S<sub>aq</sub>. (120 mL), cell: top-irradiation cell with a Pyrex window, light source: 300 W Xe-arc lamp with a long-pass filter (HOYA; Y44).

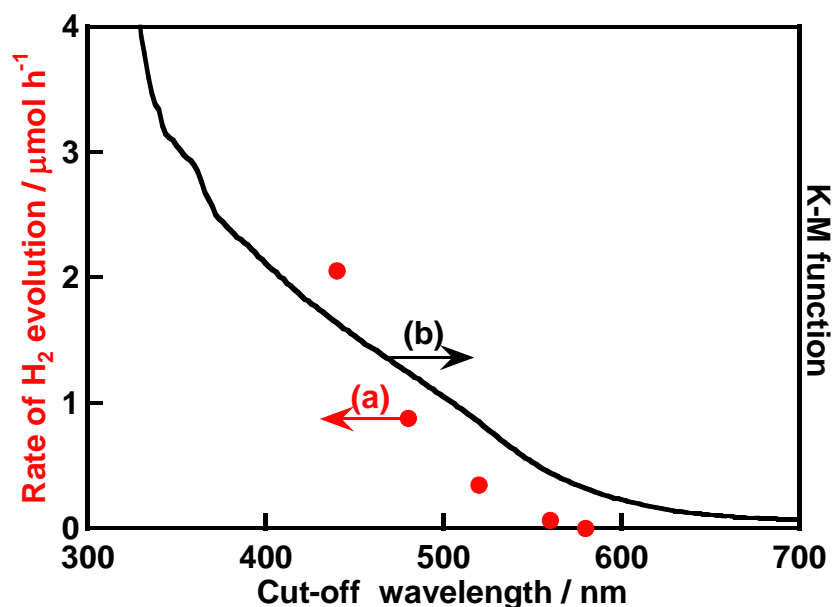

**Figure S47.** (a) Wavelength dependence of H<sub>2</sub> evolution from an aqueous solution containing sacrificial reagents and (b) diffuse reflectance spectrum of Cu(I)-Li<sub>2</sub>SrTi<sub>6</sub>O<sub>14</sub>. CuCl-CuI mixture was used as a flux for the synthesis of all Cu(I)-Li<sub>2</sub>SrTi<sub>6</sub>O<sub>14</sub>. Photocatalyst: 0.3 g, cocatalyst: Rh 1 wt%, reactant solution: 0.5 mol L<sup>-1</sup> K<sub>2</sub>SO<sub>3</sub> + 0.1 mol L<sup>-1</sup> Na<sub>2</sub>S<sub>aq</sub>. (120 mL), cell: top-irradiation cell with a Pyrex window, light source: 300 W Xe-arc lamp with long-pass filters (HOYA; Y44, Y48, Y52, O56, R58).

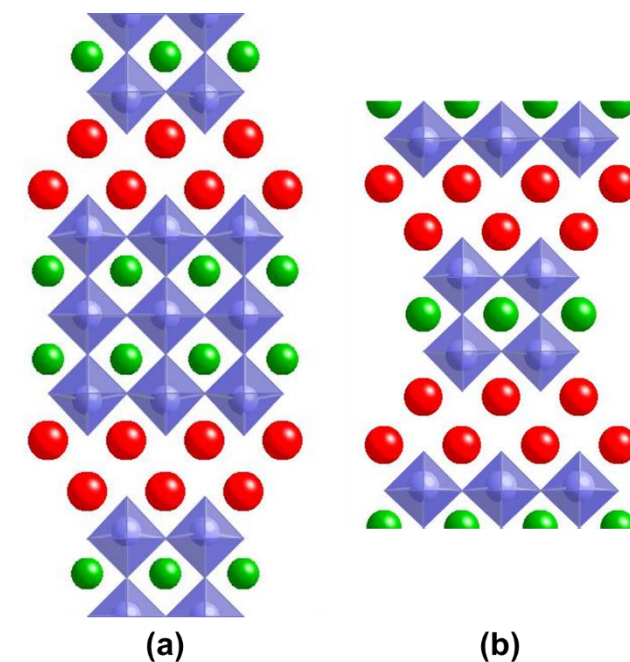

**Figure S48.** Crystal structures of (a)  $\text{K}_2\text{La}_2\text{Ti}_3\text{O}_{10}$  and (b)  $\text{K}_2\text{SrTa}_2\text{O}_7$  with a Ruddlesden-Popper type layered perovskite structure. Red spheres, green spheres, and blue octahedra indicate  $\text{K}^+$ ,  $\text{Sr}^{2+}/\text{La}^{3+}$ , and  $\text{TiO}_6/\text{TaO}_6$ , respectively.

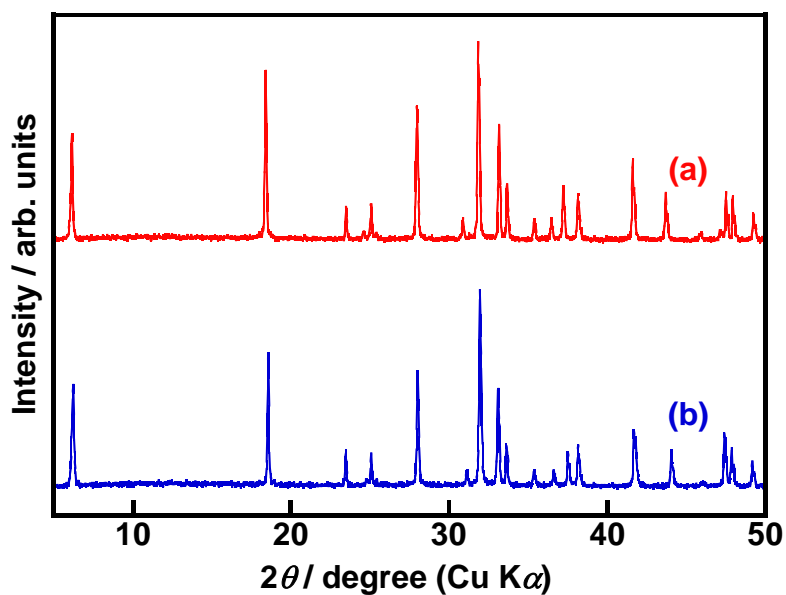

**Figure S49.** X-ray diffraction patterns of (a)  $\text{Cu(I)}\text{-K}_2\text{La}_2\text{Ti}_3\text{O}_{10}$  and (b)  $\text{Cu(I)}\text{-Na}_2\text{La}_2\text{Ti}_3\text{O}_{10}$ .  $\text{CuCl}$  was used as a flux for the synthesis of  $\text{Cu(I)}\text{-K}_2\text{La}_2\text{Ti}_3\text{O}_{10}$  and  $\text{Cu(I)}\text{-Na}_2\text{La}_2\text{Ti}_3\text{O}_{10}$ .

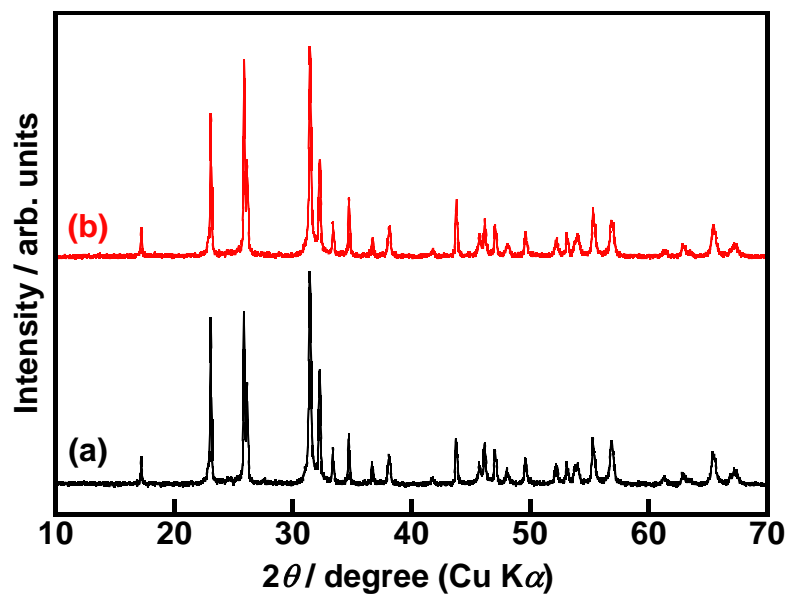

**Figure S50.** XRD patterns of Cu(I)-K<sub>2</sub>SrTa<sub>2</sub>O<sub>7</sub> (a) before and (b) after photocatalytic H<sub>2</sub> evolution from an aqueous solution containing sacrificial reagents under visible light irradiation for 50 h in Figure 13.

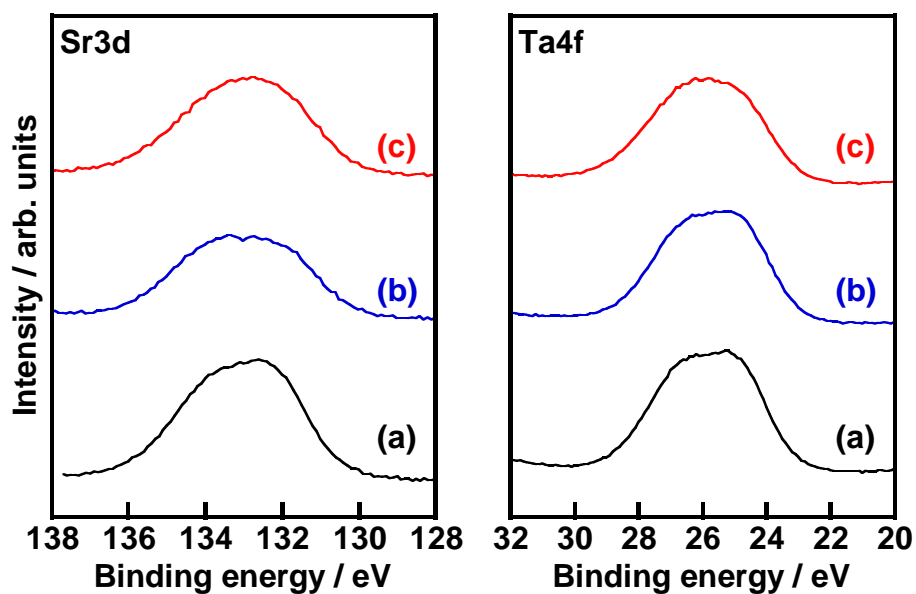

**Figure S51.** Sr3d and Ta4f XPS spectra of (a) K<sub>2</sub>SrTa<sub>2</sub>O<sub>7</sub>, (b) Ag(I)-K<sub>2</sub>SrTa<sub>2</sub>O<sub>7</sub>, and (c) Cu(I)-K<sub>2</sub>SrTa<sub>2</sub>O<sub>7</sub>. Binding energies of all peaks were calibrated with C1s (284.2 eV).

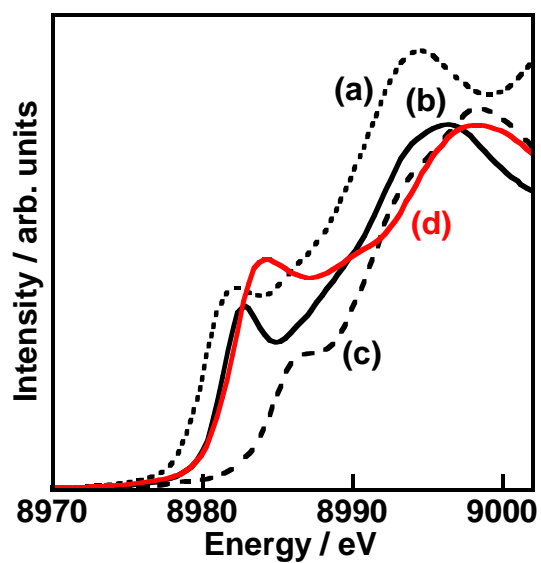

**Figure S52.** Cu K-edge XANES spectra of (a) Cu foil, (b)  $\text{Cu}_2\text{O}$ , (c)  $\text{CuO}$ , and (d)  $\text{Cu(I)-KLaTa}_2\text{O}_7$ .  $\text{CuCl}$  was used as a flux for the synthesis of  $\text{Cu(I)-KLaTa}_2\text{O}_7$ .

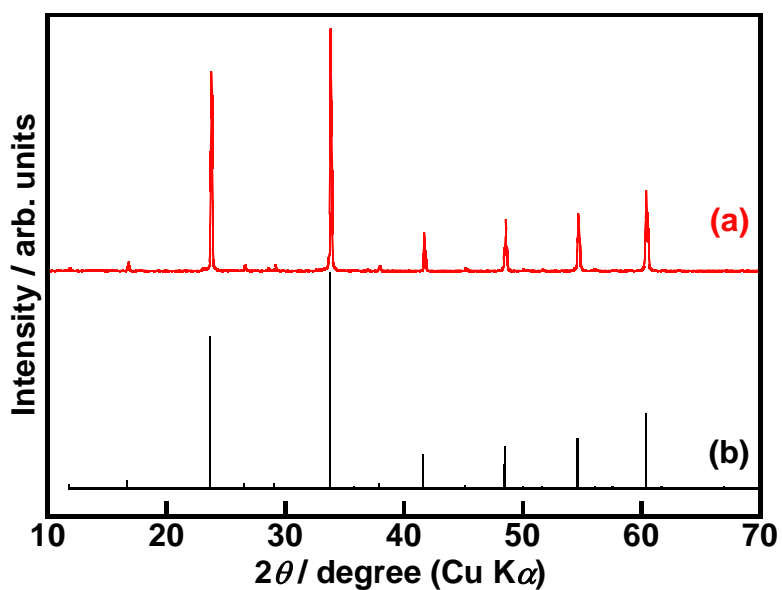

**Figure S53.** XRD patterns of (a)  $\text{CuTa}_2\text{O}_6$  prepared by a solid state reaction at 1273 K for 20 h in air and (b)  $\text{Cu}_{1.988}\text{Ta}_4\text{O}_{12}$  (PDF 1-76-7902).
